1 Parvalbumin neurons, temporal coding, and cortical noise in complex  
2 scene analysis

3

4 Authors: Jian Carlo Nocon<sup>1,2,3,4</sup>, Howard J. Gritton<sup>5,6</sup>, Nicholas M. James<sup>1,2,3,4</sup>, Rebecca A.  
5 Mount<sup>1,2,3,4</sup>, Zhili Qu<sup>5,6</sup>, Xue Han<sup>1,2,3,4</sup>, Kamal Sen<sup>1,2,3,4,\*</sup>

6 <sup>1</sup>Neurophotonics Center, Boston University, Boston, Massachusetts, United States of America  
7 02215,

8 <sup>2</sup>Center for Systems Neuroscience, Boston University, Boston, Massachusetts, United States of  
9 America, 02215

10 <sup>3</sup>Hearing Research Center, Boston University, Boston, Massachusetts, United States of America,  
11 02215

12 <sup>4</sup>Department of Biomedical Engineering, Boston University, Boston, Massachusetts, United States  
13 of America, 02215

14 <sup>5</sup>Department of Comparative Biosciences, University of Illinois, Urbana, Illinois, United States of  
15 America, 61820

16 <sup>6</sup>Department of Bioengineering, University of Illinois, Urbana, Illinois, United States of America,  
17 61820

18 \* Corresponding Author: kamalsen@bu.edu

19 **Classification:** Biological Sciences/Neuroscience

20 **Keywords:** Parvalbumin, cortical code, temporal code, cortical noise, cocktail party problem,  
21 complex scene analysis

22 **Author contributions:** J.C.N. and H.J.G. performed all experiments. J.C.N. analyzed the data.  
23 N.M.J. provided technical support and code for analysis. R.A.M. performed histological analysis.  
24 Z.Q. and H.J.G. performed additional experiments for control analysis. X.H. and K.S. obtained  
25 funding and supervised the study. J.C.N., H.J.G., X.H., and K.S. wrote the manuscript and  
26 contributed to the interpretation of the results.

## 27 **Abstract**

28 Cortical representations supporting many cognitive abilities emerge from underlying  
29 circuits comprised of several different cell types. However, cell type-specific contributions to rate  
30 and timing-based cortical coding are not well-understood. Here, we investigated the role of  
31 parvalbumin (PV) neurons in cortical complex scene analysis. Many complex scenes contain  
32 sensory stimuli which are highly dynamic in time and compete with stimuli at other spatial locations.  
33 PV neurons play a fundamental role in balancing excitation and inhibition in cortex and sculpting  
34 cortical temporal dynamics; yet their specific role in encoding complex scenes via timing-based  
35 coding, and the robustness of temporal representations to spatial competition, has not been  
36 investigated. Here, we address these questions in auditory cortex using a cocktail party-like  
37 paradigm, integrating electrophysiology, optogenetic manipulations, and a family of spike-distance  
38 metrics, to dissect PV neurons' contributions towards rate and timing-based coding. We find that  
39 suppressing PV neurons degrades cortical discrimination of dynamic sounds in a cocktail party-like  
40 setting via changes in rapid temporal modulations in rate and spike timing, over a wide range of  
41 time-scales. Our findings suggest that PV neurons play a critical role in enhancing cortical temporal  
42 coding and reducing cortical noise, thereby improving representations of dynamic stimuli in  
43 complex scenes.

## 44 **Significance Statement**

45 One impressive example of sensory perception by the brain is its ability to analyze complex  
46 scenes, e.g., following what a friend is saying at a party amongst other speakers. Although some  
47 humans can solve this problem with relative ease, it remains very difficult for humans with a variety  
48 of impairments, e.g., hearing impairments, ADHD, and autism. The brain mechanisms underlying  
49 complex scene analysis remain poorly understood. Here, we recorded neural activity in auditory  
50 cortex in a complex auditory scene. When we suppressed PV neuron activity in auditory cortex,  
51 cortical performance decreased, and the timing of cortical responses was degraded. Our findings  
52 suggest that PV neurons improve the brain's ability to analyze complex scenes by enhancing the  
53 timing of cortical responses while reducing cortical noise.

## 54 **Main Text**

### 55 **Introduction**

56  
57  
58  
59 The cerebral cortex is critical for perception, attention, decision-making, memory, and  
60 motor output. Understanding the cortical circuit mechanisms that underly these functions remains  
61 a central problem in systems neuroscience. One line of investigation towards addressing this  
62 problem has been to identify the underpinnings of the cortical code; specifically, to assess whether  
63 cortical coding relies on rate or spike timing<sup>1</sup>. Previous studies have demonstrated both rate and  
64 spike timing-based coding in cortex<sup>2, 3, 4</sup>. However, a mechanistic understanding of how cortical  
65 circuits implement these codes and on what timescales is still missing. A second line of questioning  
66 towards addressing this central problem has been to utilize a combination of anatomy, physiology  
67 and optogenetics to interrogate cortical circuits and neuron types<sup>5, 6</sup>. This concerted approach has  
68 allowed systems neuroscience to identify key contributions of specific cell types to cortical circuits,  
69 including inhibitory neurons (e.g., parvalbumin-expressing (PV), somatostatin-expressing (SOM)  
70 and vasoactive intestinal peptide-expressing (VIP) neurons)<sup>5</sup>. However, the specific contributions  
71 of these diverse cell types to the cortical code remain unclear.

72 A potentially powerful strategy for unraveling cell type-specific contributions to cortical  
73 coding is to investigate problems where cortical processing is likely to play a central role. An  
74 important example of such a problem is complex scene analysis, e.g., recognizing objects in a  
75 scene cluttered with multiple objects at different spatial locations. The brain displays an astonishing  
76 ability to navigate such complex scenes in everyday settings, an impressive feat yet to be matched

77 by state-of-the-art machines. The relative contribution of specific cell-types to this powerful  
78 computational ability remains unclear.

79 PV neurons are the most prominent group of inhibitory neurons in cortex<sup>7</sup>. Previous studies  
80 have investigated the role played by PV neurons in the generation of oscillations<sup>8</sup> and spike  
81 synchronization<sup>9</sup>. PV neurons play a fundamental role in balancing excitation and inhibition<sup>10</sup> and  
82 determining receptive field properties in cortex<sup>11, 12, 13</sup>. Optogenetic manipulation of PV neurons has  
83 provided insights into cortical responses, network dynamics, and behavior<sup>14, 15, 16, 17, 18, 19</sup>.  
84 Specifically, a study by Moore et al.<sup>19</sup> revealed that optogenetic suppression of PV neurons led to  
85 a rapid rebalancing of excitation and inhibition in cortex, with the expected increase in the activity  
86 of excitatory neurons, but a counterintuitive increase in the activity of inhibitory neurons. As  
87 elegantly dissected in the study, this occurs because the suppression of PV neurons leads to an  
88 increase in activity of excitatory neurons, which then drives both excitatory and inhibitory neurons  
89 downstream, rapidly rebalancing cortical activity. This result illuminates a property of cortical  
90 networks consistent with theoretical models but raises another question: does the suppression of  
91 PV neurons impact cortical temporal coding? The biophysical properties of PV neurons are well-  
92 suited for rapid temporal processing<sup>5</sup> and therefore may be essential in the cortical temporal coding  
93 of dynamic stimuli present in complex scenes. Additionally, narrow-spiking units, which are thought  
94 to be putative inhibitory neurons, have exhibited distinct temporal response patterns to stimulus  
95 envelopes compared to those of regular-spiking units<sup>20</sup>. This motivates several open questions: do  
96 PV neurons play a critical role in cortical temporal coding of dynamic stimuli? Are such temporal  
97 codes robust to competing stimuli at other locations in space? Here, we address these questions  
98 in auditory cortex using a combination of electrophysiology, optogenetic suppression of PV  
99 neurons, and a family of spike distance metrics<sup>21, 22</sup> to dissect specific contributions of PV neurons  
100 to the cortical code.

101 The auditory cortex (ACx) is well suited to investigate these issues. It is thought to play a  
102 key role in solving the cocktail party problem<sup>23, 24</sup>, one of the most impressive examples of complex  
103 scene analysis. Here, we integrate a cocktail party-like paradigm<sup>25</sup> with optogenetic suppression of  
104 PV neurons to investigate the specific contribution of PV neurons to temporal coding in mouse ACx.  
105 We find that suppressing PV neurons degrades discrimination performance, specifically temporal  
106 coding, in ACx, and degrades performance over a wide range of time-scales. Our results reveal  
107 that despite the rebalancing of excitation and inhibition in cortical networks observed previously,  
108 suppression of PV neurons disrupts coding throughout ACx suggesting an important influence of  
109 PV neurons on cortical temporal coding and cortical noise.

## 110 111 **Results**

112  
113  
114 We recorded single units (SUs) and multi-units (MUs) using a multielectrode array with 4  
115 shanks and 32 channels throughout different layers in ACx of PV-Arch transgenic mice (Figures  
116 1A-C and Supplementary Figure 1). We used a semi-automated detection and sorting algorithm to  
117 identify 124 units from  $N = 9$  animals<sup>26, 27</sup>. Of these 124 units, 82 were identified as SUs (e.g., Figure  
118 1C) while the remaining 42 were identified as MUs. In the results below, we focus on SUs. The  
119 results for MUs are given in Supplementary Figure 4C. Out of the SUs, 73 were identified as regular  
120 spiking (RS) while the remaining 9 were identified as narrow spiking (NS) based on the trough-  
121 peak interval of their mean waveforms (Supplementary Figure 2). RS and NS units have been  
122 found to correspond to excitatory and inhibitory neurons, respectively, in ACx<sup>12, 28</sup>.

123 To confirm specificity of expression, immunohistochemistry quantification was performed  
124 at the conclusion of the study and revealed that ~93% of PV immuno-positive cells in auditory  
125 cortex were also Arch-GFP expressing neurons. Importantly, we also found that <1% of Arch-GFP  
126 expressing cells were immuno-negative for PV antibody (Supplementary Figure 3). Optogenetic  
127 suppression occurred on approximately 50% of trials, randomly interleaved, throughout the

128 recording sessions. Suppression was achieved using light output from a 532nm laser that began  
129 50ms prior to the auditory stimulus and consisted of continuous illuminations that co-terminated  
130 with sound offset. Within a given 800-trial session, optogenetic suppression strength remained  
131 constant (2mW, 5mW or 10mW), but was varied across sessions.

132 Next, we confirmed that the effects of optogenetic suppression of PV neurons in ACx were  
133 consistent with previous studies (Figure 1E, Supplementary Figures 4-5). Upon laser onset, we  
134 found that NS units in PV-Arch-expressing subjects showed an immediate suppression of spiking  
135 followed by an increase in activity (Supplemental Figure 4A), while NS units within non-Arch-  
136 expressing subjects did not show a change in activity during laser onset (Supplemental Figure 4B).  
137 We found that upon PV suppression, RS units increased their firing rate during both spontaneous  
138 and auditory evoked periods (Figure 1E and Supplementary Figure 5A), as expected<sup>18, 19</sup>. Different  
139 intensities enhanced the firing rate of RS neurons in a level-dependent manner consistent with  
140 previous studies (Supplementary Figure 5Ai). Counter-intuitively, but consistent with the previous  
141 study by Moore et al.<sup>19</sup>, NS units also increased their firing activity (Supplementary Figure 5B). As  
142 demonstrated by Moore et al. optogenetic suppression of PV neurons also produced a  
143 compensatory increase in inhibition and a rapid rebalancing of excitation and inhibition in cortex.  
144 Thus, the effects of optogenetic suppression of PV neurons on firing rates in ACx we observed are  
145 consistent with previous studies and the rapid rebalancing of excitation and inhibition. However,  
146 the effects of PV suppression on temporal coding in ACx remain unknown. Thus, we next inquired:  
147 does PV suppression impact temporal coding in ACx?

148

149 **Investigating cortical coding in mouse ACx using a cocktail party-like paradigm.** To  
150 better understand cortical coding of complex scenes in a mouse model amenable to circuit  
151 interrogation using genetic tools, we adopted a cocktail party-like experimental paradigm<sup>25</sup> while  
152 recording from neurons in ACx. Specifically, we recorded responses to spatially-distributed sound  
153 mixtures to determine how competing sound sources influence cortical coding of stimuli. The  
154 recording configuration consisted of 4 speakers arranged around the mouse at 4 locations on the  
155 azimuthal plane: directly in front (0°), two contralateral (45° and 90°) and 1 ipsilateral (-90°) to the  
156 right auditory cortex recording area. Target stimuli consisted of white noise modulated by human  
157 speech envelopes extracted from a speech corpus<sup>29</sup>. We utilized two target waveforms (target 1  
158 and target 2) and a competing masker consisting of unmodulated white noise. Mice were exposed  
159 to either target-alone trials (Clean) or target-masker combinations (Masked) (Figures 2A-C).

160

161 **Mouse ACx neurons show spatial configuration sensitivity between competing**  
162 **auditory stimuli.** We assessed cortical coding using neural discriminability, which refers to the  
163 ability to determine stimulus identity based on neural responses and thus a neuron's ability to  
164 encode stimulus features, and a variety of other quantitative response measures. Neural  
165 discriminability between the two targets (% correct) was computed both without the masker (Clean)  
166 (Figure 2A); and with the masker (Masked), for all possible combinations of target and masker  
167 locations (Figures 2B-C). We refer to the matrix of performance values from all speaker  
168 configurations as spatial grids, which allow for visualization of the spatial tuning sensitivity of a  
169 given unit in the presence of competing auditory stimuli. Values near 100% and 50% respectively  
170 represent perfect discriminability and chance discriminability, and positions of high performance ( $\geq$   
171 70%), which were also statistically significant ( $p \leq 0.05$ ) with a relatively large effect size ( $d \geq 1$ ),  
172 were deemed as hotspots. These hotspots represent locations of enhanced discriminability  
173 between the two targets, either in the absence (Clean) or presence (Masked) of a competing  
174 masking stimulus, using a spike distance-based classifier to determine how well target identity can  
175 be predicted given the spike train from that site based on dissimilarities in spike timing and  
176 instantaneous rate<sup>25</sup> (Figure 2D: see Methods, Neural discriminability using SPIKE-distance).

177 Figure 2A illustrates spike trains from an example SU that shows high discriminability under  
178 both target-only conditions (Figures 2A, 2D, and 2E: black); and for a specific spatial configuration  
179 in the presence of a competing noise masker (Figures 2B, 2D, and 2E: red). In the masked  
180 condition, discriminability depends strongly on the spatial configuration of the target and masker,  
181 indicating that the response of this neuron is spatial configuration-sensitive (Figures 2C-E, red  
182 versus green).

183 Previous studies have demonstrated that neurons with the highest performance are most  
184 strongly correlated with behavior and strongly constrain population performance<sup>30, 31, 32, 33, 34</sup>. Thus,  
185 we were curious to test how the performance of the best neurons in our population would be  
186 affected by optogenetic suppression of PV neurons. To do so, we focused on the neurons with high  
187 discrimination performance in our population (i.e., SUs with at least one hotspot in the clean or  
188 masked conditions). 23 SUs showed hotspots at one or more spatial configurations, and there were  
189 49 hotspots in the clean condition and 20 hotspots in the masked condition giving a total of 69  
190 hotspots.

191 At each spatial configuration we observed a broad range of performance levels, consisting  
192 of neurons with significant hotspots (Figure 2F; filled circles), as well as neurons with poor  
193 performance (open circles), reflecting that different neurons in the population had different spatial  
194 configuration sensitivities. The upper envelope of maximal performance was relatively high for all  
195 spatial configurations, except co-located target-masker and ipsilateral target positions. Thus, as a  
196 population, ACx neurons showed robust performance at all spatial configurations in the  
197 contralateral hemisphere, when the target and masker were spatially separated. We did not  
198 observe any statistically significant differences in performance between SUs across different  
199 layers, or SUs with different waveform types (RS vs. NS) (Supplementary Figure 6).

200

201 **Suppression of PV neurons reduces discrimination performance at hotspots.** To  
202 investigate the role of PV interneurons in auditory discrimination performance, we compared  
203 discrimination performance at hotspots, with and without optogenetic suppression of PV neurons  
204 in ACx. Figure 3A shows an example SU with and without suppression. Compared to the control  
205 response (Figure 3Ai), the optogenetic response (Figure 3Aii) shows an increase in spiking  
206 between the peaks of both target stimuli. Specifically, the responses exhibited an earlier onset and  
207 decreased spike timing reproducibility across trials during suppression (Figure 3Aiii). Figure 3B  
208 shows the spatial grids for the same example SU during both conditions, with the example  
209 configuration in Figure 3A (Clean Target 45°) outlined in black in the control grid (Figure 3Bi) and  
210 in red in the optogenetic grid (Figure 3Bii). This unit showed a decrease in performance across all  
211 clean configurations, and the hotspots in the control masked condition (Target 90°, Masker -90°;  
212 Target 45°, Masker -90°; Target 45°, Masker 90°) showed a reduction in performance to below  
213 threshold. Overall, we found that performance decreased significantly in both clean ( $p < 1e-04$ ) and  
214 masked ( $p = 2e-04$ ) conditions during suppression (Figure 3C), a decrease that was not significant  
215 in mice that did not express PV-Arch (Supplementary Figure 7).

216

217 **Suppression of PV neurons degrades cortical temporal coding.** To determine the  
218 extent to which changes in the temporal dynamics of rapid firing rate modulation, spike timing, and  
219 average firing rate changes that occur during suppression might affect performance, we calculated  
220 different performance metrics across all hotspots. Specifically, we used inter-spike interval (ISI)-  
221 distance, rate-independent (RI)-SPIKE-distance, and spike count, as the basis for discriminability  
222 between spike trains. ISI-distance calculates the distance between two spike trains based on the  
223 dissimilarities in instantaneous firing rate modulation, while RI-SPIKE-distance measures spike  
224 timing dissimilarity between two trains while accounting for changes in firing rate differences<sup>21</sup>.  
225 Spike count distance is the absolute difference in the number of spikes between trains, effectively  
226 measuring differences in total firing rate. We found that performance based on both ISI-distance



227 (Figure 4A) and RI-SPIKE-distance (Figure 4B) performances were relatively high. Both  
228 performances showed highly significant decreases with optogenetic suppression (ISI-distance-  
229 based performance:  $p_{clean} < 1e-04$ ,  $p_{masked} = 0.0034$ ; RI-SPIKE-distance-based performance:  $p_{clean}$   
230  $< 1e-04$ ,  $p_{masked} = 0.0011$ ). In contrast, performance based on spike count over the entire stimulus  
231 (Figure 4C) was close to chance level both for control and laser conditions, indicating that spike  
232 count alone was not sufficient to account for overall performance. The significant decrease in ISI  
233 distance-based performance indicates a disruption in rate-based coding, including the dynamics of  
234 instantaneous firing rate modulations. The significant decrease in RI-SPIKE based distance  
235 indicates that spike timing-based coding is also degraded by optogenetic suppression of PV  
236 neurons (Figure 4D).

237

238 **Effects on components of discrimination performance with suppression.** Generally,  
239 discrimination performance depends on both the dissimilarity of responses between targets, as well  
240 as the similarity of responses within a target. To assess the relationship between different  
241 components of responses with performance, we calculated three metrics sensitive to firing rate  
242 and/or timing: the average firing rate; the rate-normalized root-mean-square (RMS) difference in  
243 the responses to the targets, which captures the difference in the temporal pattern of responses to  
244 the targets; and the trial similarity<sup>35</sup>, which captures the reproducibility of responses across trials  
245 within a target (see Methods).

246 We first calculated the correlation between evoked firing rate and performance during the  
247 control condition by pooling clean and masked data. Firing rate did not show a significant correlation  
248 with performance ( $r = -0.0645$ ,  $p = 0.452$ ), whereas both RMS difference and trial similarity  
249 measures were highly correlated with performance (rate-normalized RMS difference:  $r = 0.4205$ ,  $p$   
250  $< 1e-04$ ; trial similarity:  $r = 0.6013$ ,  $p < 1e-04$ ). These results suggest that both the pattern of firing  
251 rate modulations (quantified by RMS difference) as well as the reproducibility of responses  
252 (quantified by trial similarity) contribute to discrimination performance under control conditions.  
253 When comparing these measures between the control and laser conditions, we found that rate-  
254 normalized RMS difference significantly decreased with optogenetic suppression for both clean  
255 and masked trials (Figure 5A), and trial similarity significantly decreased during clean trials (Figure  
256 5B).

257

258 **Optogenetic suppression decreases performance across a wide range of time**  
259 **scales.** The previous analyses used spike distance measures which do not require a choice of a  
260 specific time-scale for analysis. A further interesting question regarding discrimination performance  
261 is the optimal time-scale for discrimination. Thus, we next quantified the time-scale for optimal  
262 discrimination using the van Rossum spike distance measure<sup>36</sup> (see Methods).

263 We found that optimal time-scales for discrimination ( $\tau$ ) for most neurons was around 40  
264 milliseconds, with a significant proportion of neurons covering even finer time scales down to ~10  
265 ms (Figure 6A). Optimal  $\tau$  was not significantly different between control and laser conditions for  
266 clean trials ( $p = 0.4920$ ) but significant for masked trials ( $p = 0.0098$ ), and performance decreased  
267 significantly in the laser condition across a wide range of time-scales (Figures 6B-D, Table 1).  
268 These results indicate that PV suppression did not significantly change the optimal time-scale for  
269 discrimination but rather degraded discrimination across a wide range of time-scales.

270

271 **Discussion**

272

273

274 **Diversity of cortical cell types and the cortical code.** One of the most striking features  
275 of the cerebral cortex is the tremendous diversity of its cell types<sup>37</sup>. Understanding the  
276 computational role of such diversity in cortical coding is central to systems neuroscience.  
277 Addressing this central question requires understanding cell type-specific contributions to the  
278 cortical code at both the single neuron and the population level. A small number of previous studies  
279 have demonstrated a role of specific cell types in cortical population coding; specifically, the  
280 generation of oscillations<sup>38, 39</sup>, and synchrony across cortical layers and areas<sup>40, 41</sup>. However, cell  
281 type-specific contributions to the cortical code at the single unit level, a fundamental aspect of  
282 cortical encoding, remain poorly understood. In this study, we addressed this fundamental gap by  
283 investigating the role of PV neurons in cortical coding of a complex scene, i.e., a cocktail party-like  
284 setting, in mouse ACx.

285

286 **Cortical discrimination & PV neurons; rate, spike timing and temporal codes.** We  
287 assessed cortical coding using neural discrimination performance and other quantitative measures.  
288 There is a rich history of quantitative work on cortical discrimination<sup>30, 32</sup>. These studies have  
289 suggested a critical role for neurons with the highest levels of performance in a population, which  
290 correlate strongly with behavioral performance and determine the overall performance at the  
291 population level. In this study we examined cortical discrimination of dynamic stimuli in a complex  
292 scene by the highest performing neurons in ACx, extending the previous body of work in several  
293 ways: First, we assessed the impact of optogenetic suppression of PV neurons on discrimination  
294 performance. Optogenetically suppressing PV neurons resulted in increased firing rate during  
295 spontaneous and auditory evoked activity, which is consistent with the effects of inhibitory blockade  
296 on cortical responses<sup>42, 43, 44</sup>. A recent study by Moore et al.<sup>19</sup> employed optogenetic suppression  
297 of PV neurons to powerfully reveal an important property of cortical networks: rapid rebalancing of  
298 excitation and inhibition upon PV suppression. Our study reveals that despite such rebalancing,  
299 cortical discrimination performance is degraded across cortical layers in ACx upon PV suppression.  
300 This finding suggests that PV neurons play a role in improving discrimination of dynamic stimuli in  
301 ACx, both sounds in quiet backgrounds, as well as in the presence of competing sounds from other  
302 spatial locations. Second, we quantified the contributions of instantaneous firing rate modulations,  
303 spike timing, and spike count towards cortical discrimination, using a family of spike distance  
304 metrics. These metrics provide a powerful set of tools for dissecting different components of cortical  
305 coding. Although these metrics have been employed in previous theoretical studies, to our  
306 knowledge this is the first time they were applied to analyze cortical responses. This analysis  
307 revealed that high discrimination performance is mediated by the temporal pattern of firing rate  
308 modulations and spike timing reproducibility, and that optogenetic suppression of PV neurons  
309 degraded both components.

310 Previous studies have demonstrated that auditory cortical neurons can employ both rate  
311 and spike timing-based codes<sup>3, 4</sup>; and provided insight into the roles of inhibitory neurons in shaping  
312 frequency tuning<sup>11, 12, 13, 45</sup>, frequency discrimination<sup>14, 46</sup>, adaptation<sup>15</sup>, sparseness<sup>47</sup>, and gap  
313 encoding<sup>28</sup>. An influential review on neural coding also defined a precise notion of a temporal code  
314 as one that contains information in spike timing beyond rate modulations<sup>48</sup>. Temporal codes have  
315 been challenging to identify because the contributions of rate vs. spike timing are often difficult to  
316 decouple. Our results based on spike distance measures, which quantify both rate-dependent and  
317 rate-independent components of coding, suggest that PV neurons specifically contribute to  
318 temporal coding in cortical discrimination. This computational portrait of PV neurons validates the  
319 importance of their established electrophysiological specializations—namely, fast, efficient, and  
320 temporally precise responses<sup>5</sup>.

321

322 **A general cortical representation for the cocktail party problem across species.** From  
323 a comparative standpoint, we found that the key features present at the cortical level within ACx of

324 the mammalian mouse was consistent with previous findings in songbirds. Specifically, a previous  
325 study by Maddox et al. found hotspots at particular spatial configurations of target and masker on  
326 the spatial grids of cortical level neurons in songbirds<sup>25</sup>. Songbirds and mice have different  
327 frequency ranges of hearing and therefore the cues used for spatial processing, e.g., interaural  
328 time difference (ITD), and interaural level difference (ILD) are frequency-dependent, and the  
329 peripheral representations of these cues are likely to be different across species with different  
330 frequency ranges of hearing. This suggests the emergence of general cortical representations for  
331 solving the cocktail party problem despite different peripheral representations of acoustic cues  
332 across species.

333

334 **Time scales of cortical discrimination.** A further interesting question regarding cortical  
335 discrimination is: what is the optimal time scale for maximal discrimination performance? One  
336 characteristic time scale in our stimuli arises from the slow modulation of speech envelopes on  
337 relatively long time-scales ~100-500 ms, or equivalently, in the 2-10 Hz frequency range<sup>49</sup>. We  
338 found that the optimal time-scale for most neurons in our dataset was much finer ~40 ms, with a  
339 significant number at even finer timescales down to ~10 ms. These time-scales are well matched  
340 to the duration of short ultrasonic vocalizations in mice (Figure 7), and finer grain structures within  
341 these vocalizations, e.g., spectral features and frequency sweeps<sup>50</sup>. These time-scales are similar  
342 to those found in a previous study of decoding sinusoidally amplitude-modulated (SAM) tones  
343 in mouse auditory cortex<sup>35</sup>, and consistent with integration time scales in cat auditory cortex<sup>51</sup>.  
344 Phonemic structures in speech also occupy similar time-scales, which are in the beta and low  
345 gamma range of frequencies<sup>52, 53</sup>. Thus, the time-scales for optimal discrimination in ACx, may be  
346 well suited for analyzing such vocalizations and the finer spectro-temporal features within.

347

348 **Cortical noise.** Our findings are also relevant in the context of cortical noise, which can  
349 have a profound impact on cortical codes<sup>54</sup>. We found that suppressing PV neurons did not change  
350 the optimal time-scale for discrimination, but rather degraded performance at a wide range of time-  
351 scales (Figure 6). Additionally, we observed that suppression impacted specific components  
352 underlying discrimination: Most notably, PV suppression decreased the difference in the pattern of  
353 responses (quantified by RMS difference) between targets as well as decreasing the reproducibility  
354 of responses across trials (quantified by trial similarity). Taken together, these observations are  
355 consistent with an overall enhancement in cortical noise level across multiple time-scales upon PV  
356 suppression. A previous study on PV suppression in ACx observed the rapid rebalancing of  
357 excitation and inhibition, suggesting maintenance of the stability of global cortical representations<sup>19</sup>.  
358 However, our results suggest that despite this excitatory-inhibitory rebalancing, PV suppression  
359 also leads to an increase in cortical noise, fundamentally impacting the fidelity of cortical coding,  
360 including temporal coding.

361

362 **Within channel vs. cross-channel inhibition.** Cortical inhibitory neurons can mediate  
363 feedforward, recurrent and di-synaptic feedback inhibition in cortical circuits, illustrated in a  
364 schematic model in Figure 8. Previous modeling studies have demonstrated that feed-forward  
365 within-channel inhibition can improve discrimination performance<sup>55</sup>; whereas inhibition across  
366 different channels can lead to the formation of hotspots and the specific pattern of spatial  
367 configuration sensitivity<sup>56</sup>. Our results suggest that PV neurons mediate within-channel inhibition,  
368 corresponding to I neurons in the schematic model. This is consistent with our finding that although  
369 suppressing PV neurons reduced discrimination performance, it did not completely eliminate the  
370 presence of hotspots on the spatial grids, suggesting that PV neurons alone do not control the  
371 emergence of hotspots. Based on these observations, we hypothesize that a separate cell-type (X  
372 neurons in Figure 8) mediates cross-channel inhibition, resulting in the generation of hotspots and



373 the specific pattern of spatial configuration sensitivity on spatial grids. A candidate cell type that  
374 may correspond to X cells are somatostatin-positive (SOM) neurons, which have been implicated  
375 in di-synaptic feedback inhibition<sup>57, 58</sup> and surround suppression<sup>59, 60</sup>. These distinct roles may be  
376 functionally well suited for solving the cocktail party problem, with one class of neurons (PV)  
377 enhancing the temporal coding of dynamic stimuli at a target location, and another class of  
378 inhibitory neurons (X) suppressing competing stimuli from other spatial locations.

379

380 **Limitations and future directions.** Several limitations in this study should be further  
381 addressed in the future. Although we used a cocktail party-like paradigm to probe auditory cortical  
382 responses to dynamic stimuli our experimental paradigm had some limitations. First, the target  
383 stimuli did not have any specific behavioral significance, unlike the case of speech recognition at a  
384 cocktail party. Second, the masker stimuli did not contain any temporal modulations, unlike  
385 competing speakers at a cocktail party. Despite the anthropomorphic nature of our stimuli, we have  
386 demonstrated for the first time that auditory cortical neurons in mice are able to encode the distinct  
387 temporal features of both targets in the presence of a competing noise masker from different spatial  
388 locations. Future studies should address these limitations, e.g., by employing mouse  
389 communication sounds as targets and maskers. Although we were able to characterize the time-  
390 scale for optimal discrimination in ACx, we did not characterize the integration window, or the  
391 encoding window<sup>48, 51, 61</sup>. Future studies that characterize both the time-scale for optimal  
392 discrimination as well as the encoding window can address whether cortical neurons also employ  
393 temporal encoding, i.e., encode information in the temporal pattern of spikes within the encoding  
394 window<sup>48</sup>. Within this study, mice were awake but listening passively, whereas listening in a cocktail  
395 party-type setting is an active sensing process. It will be interesting to probe cortical coding in  
396 awake, behaving mice in experiments where animals attend to a specific spatial location. A recent  
397 theoretical model of attention in auditory cortex, the AIM network model<sup>62</sup>, suggests distinct roles  
398 for different interneuron groups in attentional sharpening of both spatial and frequency tuning which  
399 enables flexible listening in cocktail party-like settings, e.g., monitoring the entire scene, selecting  
400 a speaker at a spatial location, and switching to a speaker at a different location. Future  
401 experiments probing distinct interneuron populations (e.g., PV, SOM and VIP neurons) in behaving  
402 animals, in conjunction with testing and extending the AIM model may further unravel cortical  
403 circuits for solving the cocktail party problem.

404

## 405 **Materials and Methods**

406

407 **Subjects.** All procedures involving animals were approved by the Boston University  
408 Institutional Animal Care and Use Committee and the University of Illinois at Urbana-Champaign  
409 Institutional Animal Care and Use Committee (IACUC). A total of 14 mice were used in this study.  
410 Original breeding pairs of parvalbumin-Cre (PV-Cre: B6;129P2-Pvalbtm1(cre)Arbr/J), and Ai40  
411 mice (Arch: B6.Cg-Gt(ROSA)26Sor<sup>tm40.1(CAG-aop3/EGFP)Hze/J</sup>) mice were obtained from Jackson  
412 Laboratory (Maine), and all breeding was done in house. Subjects consisted of both male and  
413 female PV-Arch ( $n = 9$ ) offspring and PV-Cre ( $n = 5$ ) only offspring (controls) 8-12 weeks old on the  
414 day of recording.

415

416 **Surgery.** Mice were surgically implanted with a head-plate as described previously<sup>63, 64</sup>.  
417 Briefly, under isoflurane anesthesia, stereotaxic surgery was performed to install a headplate,  
418 electrode, and optical fiber. The custom head-plate was mounted anterior to bregma allowing  
419 access to ACx caudally. The headplate was anchored to the skull with 3 stainless steel screws and  
420 dental cement. A fourth screw was connected to a metal pin and placed in the skull above the

421 contralateral cerebellum to serve as the reference. A craniotomy was made above the right auditory  
422 cortex (AP -2.3 to -3.6, ML + 4.0 to +4.5, DV). Using a stereotaxic arm, a 32-contact linear probe  
423 (Neuronexus, Ann Arbor, MI; model: a 4x8-5mm-100-400-177-CM32) with 100 $\mu$ m spacing between  
424 electrode contacts and 400 $\mu$ m spacing between shanks, was positioned into ACx, perpendicular  
425 to the cortical surface. Because of the curvature of the ACx surface, not all four shanks could be  
426 placed at precisely the same depth during each experiment. Probes were advanced until all  
427 electrode contacts were within the cortical tissue and shanks were positioned along the rostro-  
428 caudal axis of ACx (Figures 1A-C). An optical fiber, 200 $\mu$ m in diameter, was placed medially to the  
429 4 shanks and positioned between the two innermost shanks terminating at the cortical surface  
430 (Figure 1A). After implantation, mice were allowed to recover for 4-7 days before undergoing  
431 habituation to being head-fixed as described below.

432

433 **Habituation.** Following surgery and complete recovery, mice were first handled for several  
434 days before being head-fixed to the recording apparatus. Mice were gradually exposed to longer  
435 restraint periods at the same time of day as subsequent recording sessions. Each animal received  
436 at least 6 habituation sessions prior to the first recording day. Under head-fixed conditions, mice  
437 were loosely covered with a piece of lab tissue taped down on either side (Kimwipes: Kimberly-  
438 Clark, Irving, TX) to encourage reduced movement. At the conclusion of habituation, mice  
439 underwent recording sessions in the presence in the spatial stimuli as described below.

440

441 **Recording sessions and data acquisition.** All recordings were made with a Tucker Davis  
442 Technologies (TDT; Alachua, FL) RZ2 recording system in an electrically-shielded sound  
443 attenuation chamber. Broadband neural signals at 24414.0625 Hz were recorded for each of the  
444 32 channels. Local field potentials (LFPs) were band-pass filtered between 1 and 300 Hz, notch-  
445 filtered at 60 Hz, and digitized at 3051.8 Hz and used for current source density analysis (see  
446 Supplemental Methods).

447 Recording sessions consisted of both non-optogenetic and optogenetic trials in random  
448 order. The inter-trial interval was 5 seconds, with 3s of stimulus playback followed by 2s of silence.  
449 Mice were exposed to target-alone (clean) trials and target-masker (masked) combinations. 10  
450 trials were given per target identity for all possible combinations of target location, masker location  
451 (including clean trials), and optogenetic suppression of PV neurons. Thus, animals received a total  
452 of 800 trials per ~60 minute recording session, with each session having a set laser power.

453

454 **Auditory stimuli.** All auditory stimuli were generated in Matlab and consisted of either  
455 target, masker, or combination of the two stimuli played from four TDT ES-1 electrostatic speakers.  
456 Target stimuli consisted of white noise modulated in time by human speech envelopes taken from  
457 the Harvard IEEE speech corpus<sup>29</sup> which has been used in previous psychological studies of the  
458 cocktail party effect<sup>65</sup>. Masker stimuli consisted of 10 unique tokens of unmodulated white noise.  
459 Before speaker calibration, all stimuli were generated with the same RMS value, and sampling  
460 frequency was 195312 Hz to capture the frequency range of hearing in mice. Stimuli were loaded  
461 onto a custom RPvdsEx circuit on an RZ6 Multi I/O processor, which was connected to two PM2R  
462 multiplexers that controlled the location of target and masker stimuli during trials.

463 During recordings, the stimuli were presented 18 cm from the mouse's head using four  
464 speakers driven by two TDT ED-1 speaker drivers. The four speakers were arranged around the  
465 mouse at four locations on the azimuthal plane: directly in front (0°), two contralateral (45° and 90°)  
466 and 1 ipsilateral (-90°) to the right auditory cortex recording area. Before recording sessions,  
467 stimulus intensity was calibrated using a conditioning amplifier and microphone (Brüel and Kjær,  
468 Nærum, Denmark; amplifier model: 2690, and microphone model: 4939-A-011). For 7 of the 9 Arch

469 mice and the 5 PV-only control animals, all stimuli were at a measured 75dB intensity at the  
470 mouse's head. For the remaining 2 Arch mice, stimulus intensity was set to 70dB. Stimulus  
471 playback lasted 3s with a 1ms cosine ramp at onset and offset.

472

473 **Optogenetic stimulation.** Laser light for optogenetic stimulation of auditory cortex was  
474 delivered through a multimode optically-shielded 200 $\mu$ m fiber (Thorlabs, Newton, NJ; model:  
475 BFH48-200), coupled to a 532nm DPSS laser (Shanghai Laser Ltd., Shanghai, China; model:  
476 BL532T3-200FC), with the fiber tip positioned right above the cortical surface. Laser power was  
477 calibrated to 2mW, 5mW, or 10mW at the fiber tip using a light meter calibrated for 532nm  
478 wavelength (PM100D, Thorlabs, Newton, NJ). The intensity was determined based on optogenetic  
479 cortical PV suppression studies using Arch<sup>14, 66</sup>. During optogenetic  
480 trials, the laser was turned on 50ms before stimulus onset and co-terminated with the end of the  
481 auditory stimuli (Figure 1D). Square light pulses lasting 3.05s were delivered via TTL trigger from  
482 the RZ2 recording system to the laser diode controller (ADR-1805). Optogenetic trials were  
483 randomized throughout the recording session such that animals received all stimulus/masker pairs  
484 from each location with and without laser. Recordings were done in successive blocks with constant  
485 optogenetic suppression strengths of 2mW, 5mW, or 10mW, with each block lasting ~60 minutes  
486 and having their own set of control trials. These laser strengths are similar to those used in past  
487 studies<sup>14, 18</sup> and did not result in epileptiform activity in cortex.

488

489 **Histology.** At the end of the experiments, all mice were transcardially perfused and tissue  
490 was processed to confirm ArchT expression was specific to PV cell populations. Briefly, mice were  
491 perfused with 30 mL 0.01M phosphate buffered saline (Fisher Scientific, BP2944-100, Pittsburgh,  
492 PA), followed by 30 mL 4% paraformaldehyde (Sigma Aldrich, 158127, St. Louis, MO). Brains were  
493 carefully removed and post-fixed 4-12 hours in 4% paraformaldehyde before being transferred to  
494 a 30% sucrose solution for at least 24 hours before sectioning. Brains were sectioned coronally at  
495 a thickness of 50 $\mu$ m with a freezing microtome (CM 2000R; Leica) or cryostat (CM 3050S; Leica).  
496 Tissue sections were collected throughout the auditory cortex. A subset of sections (2 sections per  
497 animal) were stained with antibodies against PV (guinea pig anti-PV antibody, SWANT GP72  
498 1:1000) followed by Alexa Fluor 568 goat anti-guinea pig secondary antibody (No: A-11075,  
499 Thermo Fisher Scientific, 1:500). Antibodies and dilution concentrations were previously reported<sup>67,</sup>  
500 <sup>68, 69</sup>. Briefly, sections were rinsed with 0.01M PBS followed by a solution of 100mM glycine (No:  
501 G7126, Sigma-Aldrich) and 0.5% Triton-X in 0.01M PBS. This was followed by a 2-hour blocking  
502 buffer incubation with 5% normal goat serum and 0.5% Triton-X in 0.01M PBS. Sections were then  
503 incubated for 24 hours with primary antibody, rinsed with 100mM glycine and 0.5% Triton-X in  
504 0.01M PBS, and incubated with secondary antibody for 2 hours. Slices were lastly incubated for 10  
505 min with Hoechst 33342 (No: 62249, Thermo Fisher Scientific, 1:10,000 in 0.01M PBS), rinsed with  
506 100mM glycine and 0.5% Triton-X in 0.01M PBS before being rinsed in 100mM glycine in 0.01M  
507 PBS before mounting. Slices were mounted on slides (Fisherbrand Superfrost Plus, No: 12-5550-  
508 15, Fisher Scientific) using anti-fade mounting medium (ProLong Diamond, No: P36965, Thermo  
509 Fisher Scientific).

510

511 **Imaging and quantification.** Images were taken on a VS120 widefield Olympus  
512 microscope or an OlympusFV3000 scanning confocal microscope using a 20 $\times$  objective. All images  
513 were comprised of Z-stacks consisting of 5-6 slices taken at 10 $\mu$ m intervals throughout the 50 $\mu$ m  
514 slices. Stacks were taken from coronal sections as near as possible to the electrode location in  
515 auditory cortex. Areas were chosen to include similarly dense Arch-GFP cell counts across animals.  
516 To confirm targeting specificity, each PV+ cell was categorized as co-expressing or not expressing  
517 Arch-GFP across a 300x300 $\mu$ m grid. We also quantified the number of Arch+ cells from each stack

518 that were not PV+ based on Hoechst labeling to estimate off target expression. We analyzed 2-4  
519 non-overlapping stacks from 2 slices per animal from the animals that made up optogenetic Arch+  
520 dataset ( $n = 9$  PV-Arch). Cell counts were pooled across slices stained for the same marker for  
521 each animal and averaged to produce a single data point for quantification.

522

523 **Spike extraction and clustering.** Kilosort2 (<https://github.com/MouseLand/Kilosort>) was  
524 used to detect multi-units within the recordings<sup>26</sup>. Before spike detection and sorting, the broadband  
525 signal was band-passed between 300 and 5000 Hz using a 3<sup>rd</sup>-order Butterworth filter. Kilosort  
526 results were then loaded onto Phy2 (<https://github.com/cortex-lab/phy>) to manually determine if  
527 spike clusters exhibited neural activity or noise<sup>27</sup>. Clusters with either artifact-like waveforms from  
528 laser or similar responses across all channels were deemed as noise, and spikes with artifact-like  
529 waveforms were removed from clusters that clearly exhibited neural activity, whenever possible.  
530 Clusters were merged if the cross-correlograms were similar to the component clusters' auto-  
531 correlograms and showed overlap in principal component feature space at the same channel. The  
532 spikes toolbox (<https://github.com/cortex-lab/spikes>) was then used to import the cluster  
533 information from Phy to Matlab and extract spike waveforms from the high-passed signal<sup>26</sup>. Clusters  
534 were assigned to recording channels based on which site yielded the largest average spike  
535 amplitude. To remove any remaining artifacts from laser onset and offset, all spikes with waveforms  
536 above an absolute threshold of 1500  $\mu\text{V}$  or a positive value above 750  $\mu\text{V}$  were discarded, and  
537 clusters that still showed a high amount of remaining artifact after removal were excluded from  
538 further analysis. To determine which of the remaining clusters were single-units (SU), we utilized  
539 the sortingQuality toolbox (<https://github.com/cortex-lab/sortingQuality>) to calculate isolation  
540 distances and L-ratios<sup>70</sup>. SUs must 1) have less than 5% of inter-spike intervals below 2ms (Figure  
541 1C), 2) an isolation distance above 15, and 3) an L-ratio below 0.25. For clusters where isolation  
542 distance and L-ratio were not defined, the first threshold was used. These thresholds are consistent  
543 with values used in past studies on single-unit activity<sup>71, 72, 73</sup>, and clusters that did not meet any of  
544 these criteria were deemed multi-units (MUs). Finally, SUs were classified as narrow-spiking if the  
545 trough-peak interval of their mean waveform was below 0.5ms, a threshold that is consistent with  
546 past findings on excitatory and inhibitory units in mouse auditory cortex<sup>12</sup>.

547

548 **Neural discriminability performance using SPIKE-distance.** Neural discrimination  
549 performance refers to the ability to determine stimulus identity based on neural responses, thus  
550 measuring a neuron's ability to encode stimulus features. Here, performance was calculated using  
551 a template-matching approach similar to our previous studies<sup>25</sup>. Briefly, spike trains were classified  
552 to one of the two target stimuli based on whose template, one from each stimulus, yielded a smaller  
553 spike distance. For each target-masker configuration, 100 iterations of template matching were  
554 done. In each iteration, one of the 10 spike trains for each target was chosen as a template, and  
555 all remaining trials were matched to each template to determine target identity. All possible pairs of  
556 templates were used across the 100 iterations to calculate an average value of neural  
557 discriminability. SPIKE-distance<sup>21</sup> calculates the dissimilarity between two spike trains based on  
558 differences in spike timing and instantaneous firing rate without additional parameters. For one  
559 spike train in a pair, the instantaneous spike timing difference at time  $t$  is:

560 
$$S_1(t) = \frac{\Delta t_P^{(1)}(t)x_F^{(1)} + \Delta t_F^{(1)}(t)x_P^{(1)}}{x_{SI}^{(1)}(t)}, t_P^{(1)} \leq t \leq t_F^{(1)}$$

561 where  $\Delta t_P$  represents the distance between the preceding spike from train 1 ( $t_P^{(1)}$ ) and the nearest  
562 spike from train 2,  $\Delta t_F$  represents the distance between the following spike from train 1 ( $t_F^{(1)}$ ) and  
563 the nearest spike from train 2,  $x_F$  is the absolute difference between  $t$  and  $t_F^{(1)}$ , and  $x_P$  is the absolute  
564 difference between  $t$  and  $t_P^{(1)}$ . To calculate  $S_2(t)$ , the spike timing difference from the view of the

565 other train, all spike times and ISIs are replaced with the relevant values in train 2. The pairwise  
566 instantaneous difference between the two trains is calculated as:

$$567 \quad S''(t) = \frac{S_1(t) + S_2(t)}{2\langle x_{ISI}^1(t), x_{ISI}^2(t) \rangle}$$

568 Finally,  $S_1(t)$  and  $S_2(t)$  are locally weighted by their instantaneous spike rates to account  
569 for differences in firing rate:

$$570 \quad S(t) = \frac{S_1(t)x_{ISI}^2(t) + S_2(t)x_{ISI}^1(t)}{2\langle x_{ISI}^1(t), x_{ISI}^2(t) \rangle^2}$$

571 For a train of length  $T$ , the distance is the integral of the dissimilarity profile across the entire  
572 response interval, with a minimum value of 0 for identical spike trains:

$$573 \quad D_S = \frac{1}{T} \int_0^T S(t) dt$$

574 cSPIKE, a toolbox used to calculate SPIKE-distance, was used to calculate all spike train distances  
575 between all possible spike train pairs for all spatial grid configurations<sup>21</sup>.

576 To determine how firing rate modulation, spike timing, and average firing rate contribute to  
577 discriminability, we used different distance measures as inputs to the classifier. For all hotspots,  
578 performances using inter-spike interval (ISI)-distance, rate-independent (RI)-SPIKE-distance, and  
579 spike count distance, the absolute difference in spike count between trains, were also calculated  
580 and compared to SPIKE-distance-based values.

581

582 **ISI-distance.** To determine how optogenetic suppression affects rapid temporal  
583 modulations in firing rate, ISI-distances were calculated. The ISI-distance calculates the  
584 dissimilarity between two spike trains based on differences in instantaneous rate synchrony. For a  
585 given time point:

$$586 \quad I(t) = \frac{|x_{ISI}^{(1)}(t) - x_{ISI}^{(2)}(t)|}{\max(x_{ISI}^{(1)}(t), x_{ISI}^{(2)}(t))}$$

587 This profile is then integrated along the spike train length to give a distance value, with values of 0  
588 obtained for either identical spike trains or pairs with the same constant firing rate and a global  
589 phase shift difference.

590

591 **RI-SPIKE-distance.** To determine how optogenetic suppression affects spike timing, RI-  
592 SPIKE-distances between spike trains were calculated. The RI-SPIKE-distance is rate-  
593 independent, as it does not take differences in local firing rate between the two spike trains into  
594 account. From SPIKE-distance calculations, the final step of weighing  $S_1(t)$  and  $S_2(t)$  by their  
595 instantaneous spike rates is skipped, yielding:

$$596 \quad S_{1,2}^{RI}(t) = \frac{S_1(t) + S_2(t)}{2\langle x_{ISI}^1(t), x_{ISI}^2(t) \rangle}$$

597 Like the other measures, the dissimilarity profile is integrated to give a distance value, with a value  
598 of 0 obtained for two identical spike trains.



599

600 **Rate-normalized RMS difference and trial similarity.** In addition to average firing rate,  
601 we also calculated two other measures to determine their impact on classification performance: the  
602 similarity of responses within target, and the dissimilarity of responses across targets. To quantify  
603 intertrial reliability of responses to target stimuli, we adopted the measure of trial similarity from  
604 previous studies<sup>35</sup>. Specifically, we randomly divided the 10 trials in each configuration into two  
605 equal groups, binned spike times with a time resolution of 25ms, and calculated the Pearson's  
606 correlation coefficient between the two resulting PSTHs. This process was repeated 100 times to  
607 obtain a mean correlation coefficient, or trial similarity.

608 We also calculated the rate-normalized RMS difference between target responses to  
609 quantify the dissimilarity in the temporal pattern of responses between the two targets. We first  
610 binned each target response using the same time-resolution as trial similarity (25ms) and  
611 normalized each PSTH such that the sum of all bins over time was 1. The RMS difference between  
612 the two rate-normalized PSTHs was then calculated. This measure quantifies the dissimilarity in  
613 the temporal pattern of responses across the targets, accounting for differences in mean evoked  
614 firing rate between targets.

615 All three response measures (average firing rate, trial similarity, and rate-normalized RMS  
616 difference between targets) were correlated with SPIKE-distance-based performance using  
617 Pearson's correlation coefficients, with separate calculations done for control and laser trials.

618

619 **Decoding time analysis using van Rossum distances.** To estimate the decoding time  
620 of the spike trains at each hotspot, we used van Rossum distances<sup>36</sup>. Briefly, the van Rossum  
621 distance between two spike trains involves convolving each response with a decaying exponential  
622 kernel with time constant  $\tau$ . The distance between two smoothed spike trains  $f_1(t)$  and  $f_2(t)$  is  
623 calculated as:

$$D_{VR} = \sqrt{\frac{1}{\tau} \int_0^{\infty} (f_1(t) - f_2(t))^2 dt}$$

624  
625 For each spatial grid configuration, a distance matrix containing the van Rossum distances between  
626 all possible spike train pairs was set as the input for the template-matching approach. Performance  
627 was calculated across a range of  $\tau$  values, increasing in powers of 2 from 1ms to 256ms. Finally,  
628 to determine the optimal  $\tau$  value at which performance was maximized for each configuration, we  
629 implemented a fine-grain parameter where  $\tau$  was varied in steps of 1ms, with the optimization  
630 separately done for control and laser trials.

631

632 **Statistics and reproducibility.** All single-units and spatial grid data were extracted from  
633  $N = 9$  mice. Spatial grid hotspots of high neural discriminability were determined using three criteria:  
634 1) mean performance must be above 70% during control trials; 2) mean control performance  
635 distribution must be significantly different from chance ( $p < 0.05$ ), calculated using a null distribution  
636 obtained by classifying spike trains within each target, which should result in chance performance;  
637 and 3) the effect size given by Cohen's  $d$  between the two distributions (control vs. null) must be  
638 greater than 1:

639

$$d = \frac{\bar{x}_1 - \bar{x}_0}{\sqrt{\frac{(n_1 - 1)s_1^2 + (n_0 - 1)s_0^2}{n_1 + n_0 - 2}}}$$

640 where values with subscript 0 represent the mean, standard deviation, and number of template-  
641 matching iterations for the null performance distribution. Additionally, configurations where at least  
642 3 trials for one target showed zero spiking were excluded from analysis, to avoid inaccurate  
643 estimates of performance. This resulted in  $n = 49$  clean configurations and  $n = 20$  masked  
644 configurations, both of which were used to analyze the effects of suppression on discriminability  
645 and spiking activity. In the manuscript, we focus on SUs with hotspots in the control condition. We  
646 found a small number of emergent hotspots (12 from 10 single-units across both clean and masked  
647 trials) where performance and effect size were both below threshold in the control condition but  
648 above threshold in the laser condition, with a median performance 72.9% and an inter-quartile  
649 range of 2.35%. To analyze the effects of suppression on performance metrics, we used built-in  
650 Matlab functions to run paired  $t$ -tests between control and optogenetic values to determine  
651 statistical significance ( $p \leq 0.05$ ), with tests done separately for clean and masked trials.

652 We also analyzed 47 low performance hotspots—configurations with performances  
653 between chance and our threshold of 70%—in three separate groups: hotspots with effect sizes 1)  
654 between 0.2 and 0.5, 2) between 0.5 and 0.8, and 3) greater than 0.8. To determine whether low-  
655 performance hotspots showed similar changes in performance to our main set of hotspots, we ran  
656 paired  $t$ -tests and calculated the effect size of optogenetic suppression on discriminability. For the  
657 first group, we found 68 clean configurations and 352 masked configurations. Clean performance  
658 did not significantly decrease ( $p = 0.8116$ ,  $d = -0.03$ ) while masked performance did ( $p < 1e-04$ ,  $d$   
659  $= 0.24$ ). For the second group, both clean ( $n = 56$ ,  $p = 0.0150$ ,  $d = 0.34$ ) and masked ( $n = 166$ ,  $p <$   
660  $1e-04$ ,  $d = 0.67$ ) performance decreased with suppression. For the last group, both clean ( $n = 35$ ,  
661  $p = 0.0043$ ,  $d = 0.52$ ) and masked ( $n = 98$ ,  $p < 1e-04$ ,  $d = 0.84$ ) performance decreased with  
662 suppression.

663

664

665

## 666 References

667

- 668 1. deCharms RC, Zador A. Neural representation and the cortical code. *Annu Rev Neurosci*  
669 **23**, 613-647 (2000).
- 670 2. Zuo Y, Safaai H, Notaro G, Mazzone A, Panzeri S, Diamond ME. Complementary  
671 contributions of spike timing and spike rate to perceptual decisions in rat S1 and S2 cortex.  
672 *Curr Biol* **25**, 357-363 (2015).
- 673 3. Yao JD, Sanes DH. Temporal Encoding is Required for Categorization, But Not  
674 Discrimination. *Cereb Cortex* **31**, 2886-2897 (2021).
- 675 4. Lu T, Liang L, Wang X. Temporal and rate representations of time-varying signals in the  
676 auditory cortex of awake primates. *Nat Neurosci* **4**, 1131-1138 (2001).
- 677 5. Tremblay R, Lee S, Rudy B. GABAergic Interneurons in the Neocortex: From Cellular  
678 Properties to Circuits. *Neuron* **91**, 260-292 (2016).
- 679 6. Pfeffer CK, Xue M, He M, Huang ZJ, Scanziani M. Inhibition of inhibition in visual cortex:  
680 the logic of connections between molecularly distinct interneurons. *Nat Neurosci* **16**, 1068-  
681 1076 (2013).
- 682 7. Canales A, Scheuer KS, Zhao X, Jackson MB. Unitary synaptic responses of parvalbumin  
683 interneurons evoked by excitatory neurons in the mouse barrel cortex. *Cereb Cortex*,  
684 (2022).

- 685 8. Antonoudiou P, Tan YL, Kontou G, Upton AL, Mann EO. Parvalbumin and Somatostatin  
686 Interneurons Contribute to the Generation of Hippocampal Gamma Oscillations. *J Neurosci*  
687 **40**, 7668-7687 (2020).
- 688 9. Jang HJ, Chung H, Rowland JM, Richards BA, Kohl MM, Kwag J. Distinct roles of  
689 parvalbumin and somatostatin interneurons in gating the synchronization of spike times in  
690 the neocortex. *Sci Adv* **6**, eaay5333 (2020).
- 691 10. Wehr M, Zador AM. Balanced inhibition underlies tuning and sharpens spike timing in  
692 auditory cortex. *Nature* **426**, 442-446 (2003).
- 693 11. Li LY, *et al.* A feedforward inhibitory circuit mediates lateral refinement of sensory  
694 representation in upper layer 2/3 of mouse primary auditory cortex. *J Neurosci* **34**, 13670-  
695 13683 (2014).
- 696 12. Li LY, Xiong XR, Ibrahim LA, Yuan W, Tao HW, Zhang LI. Differential Receptive Field  
697 Properties of Parvalbumin and Somatostatin Inhibitory Neurons in Mouse Auditory Cortex.  
698 *Cereb Cortex* **25**, 1782-1791 (2015).
- 699 13. Moore AK, Wehr M. Parvalbumin-expressing inhibitory interneurons in auditory cortex are  
700 well-tuned for frequency. *J Neurosci* **33**, 13713-13723 (2013).
- 701 14. Aizenberg M, Mwilambwe-Tshilobo L, Briguglio JJ, Natan RG, Geffen MN. Bidirectional  
702 Regulation of Innate and Learned Behaviors That Rely on Frequency Discrimination by  
703 Cortical Inhibitory Neurons. *PLoS Biol* **13**, e1002308 (2015).
- 704 15. Natan RG, *et al.* Complementary control of sensory adaptation by two types of cortical  
705 interneurons. *Elife* **4**, (2015).
- 706 16. Blackwell JM, Geffen MN. Progress and challenges for understanding the function of  
707 cortical microcircuits in auditory processing. *Nat Commun* **8**, 2165 (2017).
- 708 17. Seybold BA, Phillips EAK, Schreiner CE, Hasenstaub AR. Inhibitory Actions Unified by  
709 Network Integration. *Neuron* **87**, 1181-1192 (2015).
- 710 18. Phillips EA, Hasenstaub AR. Asymmetric effects of activating and inactivating cortical  
711 interneurons. *Elife* **5**, (2016).
- 712 19. Moore AK, Weible AP, Balmer TS, Trussell LO, Wehr M. Rapid Rebalancing of Excitation  
713 and Inhibition by Cortical Circuitry. *Neuron* **97**, 1341-1355 e1346 (2018).
- 714 20. Penikis KB, Sanes DH. A Redundant Cortical Code for Speech Envelope. *J Neurosci* **43**,  
715 93-112 (2023).
- 716 21. Satuavuori E, Kreuz T. Which spike train distance is most suitable for distinguishing rate  
717 and temporal coding? *J Neurosci Methods* **299**, 22-33 (2018).
- 718 22. Kreuz T, Chicharro D, Houghton C, Andrzejak RG, Mormann F. Monitoring spike train  
719 synchrony. *J Neurophysiol* **109**, 1457-1472 (2013).
- 720 23. Narayan R, *et al.* Cortical interference effects in the cocktail party problem. *Nat Neurosci*  
721 **10**, 1601-1607 (2007).
- 722 24. Mesgarani N, Chang EF. Selective cortical representation of attended speaker in multi-  
723 talker speech perception. *Nature* **485**, 233-236 (2012).
- 724 25. Maddox RK, Billimoria CP, Perrone BP, Shinn-Cunningham BG, Sen K. Competing sound  
725 sources reveal spatial effects in cortical processing. *PLoS Biol* **10**, e1001319 (2012).
- 726 26. Pachitariu M, Steinmetz N, Kadir S, Carandini M, Harris KD. Kilosort: realtime spike-sorting  
727 for extracellular electrophysiology with hundreds of channels. *bioRxiv*, (2016).
- 728 27. Rossant C, *et al.* Spike sorting for large, dense electrode arrays. *Nat Neurosci* **19**, 634-641  
729 (2016).
- 730 28. Keller CH, Kaylegian K, Wehr M. Gap encoding by parvalbumin-expressing interneurons  
731 in auditory cortex. *J Neurophysiol* **120**, 105-114 (2018).
- 732 29. Rothausen EH, Chapman, W. D., Guttman, N., Nordby, K. S., Silbiger, H. R., Urbanek, G.  
733 E., & Weinstock, M. I.E.E.E. recommended practice for speech quality measurements.  
734 *IEEE Trans Audio Electroacoust* **17**, 225-246 (1969).
- 735 30. Britten KH, Shadlen MN, Newsome WT, Movshon JA. The analysis of visual motion: a  
736 comparison of neuronal and psychophysical performance. *J Neurosci* **12**, 4745-4765  
737 (1992).
- 738 31. Parker AJ, Newsome WT. Sense and the single neuron: probing the physiology of  
739 perception. *Annu Rev Neurosci* **21**, 227-277 (1998).

- 740 32. Wang L, Narayan R, Grana G, Shamir M, Sen K. Cortical discrimination of complex natural  
741 stimuli: can single neurons match behavior? *J Neurosci* **27**, 582-589 (2007).
- 742 33. Billimoria CP, Kraus BJ, Narayan R, Maddox RK, Sen K. Invariance and sensitivity to  
743 intensity in neural discrimination of natural sounds. *J Neurosci* **28**, 6304-6308 (2008).
- 744 34. Downer JD, Bigelow J, Runfeldt MJ, Malone BJ. Temporally precise population coding of  
745 dynamic sounds by auditory cortex. *J Neurophysiol* **126**, 148-169 (2021).
- 746 35. Hoglen NEG, Larimer P, Phillips EAK, Malone BJ, Hasenstaub AR. Amplitude modulation  
747 coding in awake mice and squirrel monkeys. *J Neurophysiol* **119**, 1753-1766 (2018).
- 748 36. van Rossum MC. A novel spike distance. *Neural Comput* **13**, 751-763 (2001).
- 749 37. Scala F, *et al.* Phenotypic variation of transcriptomic cell types in mouse motor cortex.  
750 *Nature*, (2020).
- 751 38. Cardin JA, *et al.* Driving fast-spiking cells induces gamma rhythm and controls sensory  
752 responses. *Nature* **459**, 663-667 (2009).
- 753 39. Sohal VS, Zhang F, Yizhar O, Deisseroth K. Parvalbumin neurons and gamma rhythms  
754 enhance cortical circuit performance. *Nature* **459**, 698-702 (2009).
- 755 40. Bruno RM, Simons DJ. Feedforward mechanisms of excitatory and inhibitory cortical  
756 receptive fields. *J Neurosci* **22**, 10966-10975 (2002).
- 757 41. Xiang Z, Huguenard JR, Prince DA. Cholinergic switching within neocortical inhibitory  
758 networks. *Science* **281**, 985-988 (1998).
- 759 42. Wang JA, McFadden SL, Caspary D, Salvi R. Gamma-aminobutyric acid circuits shape  
760 response properties of auditory cortex neurons. *Brain Research* **944**, 219-231 (2002).
- 761 43. Kurt S, Moeller CK, Jeschke M, Schulze H. Differential effects of iontophoretic application  
762 of the GABAA-antagonists bicuculline and gabazine on tone-evoked local field potentials  
763 in primary auditory cortex: interaction with ketamine anesthesia. *Brain Res* **1220**, 58-69  
764 (2008).
- 765 44. Chen QC, Jen PH. Bicuculline application affects discharge patterns, rate-intensity  
766 functions, and frequency tuning characteristics of bat auditory cortical neurons. *Hear Res*  
767 **150**, 161-174 (2000).
- 768 45. Kato HK, Asinof SK, Isaacson JS. Network-Level Control of Frequency Tuning in Auditory  
769 Cortex. *Neuron* **95**, 412-423 e414 (2017).
- 770 46. Briguglio JJ, Aizenberg M, Balasubramanian V, Geffen MN. Cortical Neural Activity  
771 Predicts Sensory Acuity Under Optogenetic Manipulation. *J Neurosci* **38**, 2094-2105  
772 (2018).
- 773 47. Liang F, *et al.* Sparse Representation in Awake Auditory Cortex: Cell-type Dependence,  
774 Synaptic Mechanisms, Developmental Emergence, and Modulation. *Cereb Cortex* **29**,  
775 3796-3812 (2019).
- 776 48. Theunissen F, Miller JP. Temporal encoding in nervous systems: a rigorous definition. *J*  
777 *Comput Neurosci* **2**, 149-162 (1995).
- 778 49. Ding N, Patel AD, Chen L, Butler H, Luo C, Poeppel D. Temporal modulations in speech  
779 and music. *Neurosci Biobehav Rev* **81**, 181-187 (2017).
- 780 50. Castellucci GA, Calbick D, McCormick D. The temporal organization of mouse ultrasonic  
781 vocalizations. *PLoS One* **13**, e0199929 (2018).
- 782 51. Chen C, Read HL, Escabi MA. Precise feature based time scales and frequency  
783 decorrelation lead to a sparse auditory code. *J Neurosci* **32**, 8454-8468 (2012).
- 784 52. Ghitza O. Linking speech perception and neurophysiology: speech decoding guided by  
785 cascaded oscillators locked to the input rhythm. *Front Psychol* **2**, 130 (2011).
- 786 53. Teng X, Poeppel D. Theta and Gamma Bands Encode Acoustic Dynamics over Wide-  
787 Ranging Timescales. *Cereb Cortex* **30**, 2600-2614 (2020).
- 788 54. Shadlen MN, Newsome WT. Noise, neural codes and cortical organization. *Curr Opin*  
789 *Neurobiol* **4**, 569-579 (1994).
- 790 55. Narayan R, Ergun A, Sen K. Delayed inhibition in cortical receptive fields and the  
791 discrimination of complex stimuli. *J Neurophysiol* **94**, 2970-2975 (2005).
- 792 56. Dong J, Colburn HS, Sen K. Cortical Transformation of Spatial Processing for Solving the  
793 Cocktail Party Problem: A Computational Model(1,2,3). *eNeuro* **3**, (2016).



- 794 57. Kapfer C, Glickfeld LL, Atallah BV, Scanziani M. Supralinear increase of recurrent inhibition  
795 during sparse activity in the somatosensory cortex. *Nat Neurosci* **10**, 743-753 (2007).
- 796 58. Silberberg G, Markram H. Disynaptic inhibition between neocortical pyramidal cells  
797 mediated by Martinotti cells. *Neuron* **53**, 735-746 (2007).
- 798 59. Adesnik H, Bruns W, Taniguchi H, Huang ZJ, Scanziani M. A neural circuit for spatial  
799 summation in visual cortex. *Nature* **490**, 226-231 (2012).
- 800 60. Lakunina AA, Nardoci MB, Ahmadian Y, Jaramillo S. Somatostatin-Expressing  
801 Interneurons in the Auditory Cortex Mediate Sustained Suppression by Spectral Surround.  
802 *J Neurosci* **40**, 3564-3575 (2020).
- 803 61. Norman-Haignere SV, *et al.* Multiscale temporal integration organizes hierarchical  
804 computation in human auditory cortex. *Nat Hum Behav* **6**, 455-469 (2022).
- 805 62. Chou KF, Sen K. AIM: A network model of attention in auditory cortex. *PLoS Comput Biol*  
806 **17**, e1009356 (2021).
- 807 63. Gritton HJ, *et al.* Oscillatory activity in alpha/beta frequencies coordinates auditory and  
808 prefrontal cortices during extinction learning. *bioRxiv*, (2020).
- 809 64. James NM, Gritton HJ, Kopell N, Sen K, Han X. Muscarinic receptors regulate auditory and  
810 prefrontal cortical communication during auditory processing. *Neuropharmacology* **144**,  
811 155-171 (2019).
- 812 65. Hawley ML, Litovsky RY, Culling JF. The benefit of binaural hearing in a cocktail party:  
813 effect of location and type of interferer. *J Acoust Soc Am* **115**, 833-843 (2004).
- 814 66. Zhu Y, Qiao W, Liu K, Zhong H, Yao H. Control of response reliability by parvalbumin-  
815 expressing interneurons in visual cortex. *Nat Commun* **6**, 6802 (2015).
- 816 67. Keaveney MK, Tseng HA, Ta TL, Gritton HJ, Man HY, Han X. A MicroRNA-Based Gene-  
817 Targeting Tool for Virally Labeling Interneurons in the Rodent Cortex. *Cell Rep* **24**, 294-  
818 303 (2018).
- 819 68. Gritton HJ, *et al.* Unique contributions of parvalbumin and cholinergic interneurons in  
820 organizing striatal networks during movement. *Nat Neurosci* **22**, 586-597 (2019).
- 821 69. Tseng H-a, Mount RA, Lowet E, Gritton HJ, Cheung C, Han X. Membrane Voltage  
822 Dynamics of Parvalbumin Interneurons Orchestrate Hippocampal Theta Rhythmicity.  
823 *bioRxiv*, 2022.2011.2014.516448 (2022).
- 824 70. Schmitzer-Torbert N, Jackson J, Henze D, Harris K, Redish AD. Quantitative measures of  
825 cluster quality for use in extracellular recordings. *Neuroscience* **131**, 1-11 (2005).
- 826 71. Kvitsiani D, Ranade S, Hangya B, Taniguchi H, Huang JZ, Kepecs A. Distinct behavioural  
827 and network correlates of two interneuron types in prefrontal cortex. *Nature* **498**, 363-366  
828 (2013).
- 829 72. Monaghan JJM, Garcia-Lazaro JA, McAlpine D, Schaette R. Hidden Hearing Loss Impacts  
830 the Neural Representation of Speech in Background Noise. *Curr Biol* **30**, 4710-4721 e4714  
831 (2020).
- 832 73. Jung F, Yanovsky Y, Brankack J, Tort ABL, Draguhn A. Respiratory entrainment of units  
833 in the mouse parietal cortex depends on vigilance state. *Pflugers Arch*, (2022).
- 834 74. Wesson DW, Donahou TN, Johnson MO, Wachowiak M. Sniffing behavior of mice during  
835 performance in odor-guided tasks. *Chem Senses* **33**, 581-596 (2008).

836

## 837 Acknowledgments

838 This research was supported by the National Science Foundation (#IIS-1835270), the  
839 National Institute of Health (#1R34NS111742-01 and #1T32DC013017-01A1), and the Boston  
840 University Micro and Nano Imaging Facility (NIH S10OD024993) We would like to thank Alberto  
841 Cruz-Martín, Michael Economo, and Conor Houghton for comments and suggestions on the  
842 manuscript. We also thank Monty Escabi and Oded Ghizya for discussions on coding time-scales  
843 in auditory cortex and speech.

844



845 **Competing Interest Statement:** The authors declare no conflicts of interest.

846

847 **Data Availability Statement:** The data used for the analysis in this study is available upon request.

848 The source data for the figures and code used in this study are available at [github.com/NSNC-](https://github.com/NSNC-Lab/SpatialDiscriminabilityAnalysis)

849 [Lab/SpatialDiscriminabilityAnalysis](https://github.com/NSNC-Lab/SpatialDiscriminabilityAnalysis).

850 **Figures and Tables**

851

852 **Figure 1. Experimental methods. A:** Illustration depicting recording electrode location and optical  
853 fiber placement. Subjects were implanted with a 4-shank, 32-channel electrode array and  
854 optogenetic fiber in right hemisphere of ACx. Each shank contained 8 sites per shank with 100 $\mu$ m  
855 spacing between electrode contacts. **B:** Representative local field potential (LFP) activity from one  
856 mouse. LFP was used to estimate current source density and the layer of the recording site within  
857 each shank (Supplementary Figure 1). **C:** Example mean single unit waveform and inter-spike  
858 interval (ISI) auto-correlogram. Dashed lines in mean waveform represent one standard deviation  
859 above and below the mean, while scale bars are equal to 200 $\mu$ V and 1ms. Dashed red lines in  
860 correlogram represent ISIs of  $\pm 2$ ms. **D:** Schematic for control and optogenetic trial presentation.  
861 During approximately 50% of all trials, a 532nm laser would turn on 50ms before sound stimulus  
862 onset and turn off coincident with sound offset. **E:** Paired comparisons of mean evoked firing rate  
863 during control and laser trials. Paired *t*-tests yielded a significant increase in evoked firing rate  
864 during optogenetic suppression for clean ( $n = 49$  configurations;  $p < 1e-04$ ,  $d = -0.92$ ) and masked  
865 trials ( $n = 20$  configurations;  $p = 0.0219$ ,  $d = -0.56$ ).

866 **Figure 2. Cortical discrimination in a cocktail party paradigm in mouse ACx. A:** Illustration  
867 depicting the stimulus configuration for clean trials originating at +90° azimuth (**Ai**) and responses  
868 to both target stimuli (T) (**Aii**). Auditory stimuli were presented from speakers at 4 locations. Target  
869 stimuli consisted of white noise modulated by human speech envelopes extracted from recordings  
870 of speech sentences (see Methods, Auditory stimuli). As shown in **Aii**, responses during clean trials  
871 exhibit spike timing and rapid firing rate modulation that follow the amplitude envelope of both target  
872 stimuli. All plotted PSTHs have a bin length of 20ms. **Bi:** Stimulus configuration for trials where  
873 targets (T) played at +90° and a competing masking stimulus (M) played at -90°. Masking stimuli  
874 consisted of unmodulated white noise with the same onset and offset times as target stimuli. **Bii:**  
875 Responses to masked trials shown in **Di**. In this configuration, spike timing and firing rate  
876 modulation follow both target stimuli, despite the presence of the competing masker. **Ci:** Stimulus  
877 configuration for trials where targets played at 0° and maskers played at +45°. **Cii:** Responses to  
878 target-masker configuration shown in **Ci**. For this configuration, spike timing and firing rate  
879 modulation do not follow either target stimulus, resulting in similar responses between target  
880 identities. **D:** Neural discriminability performance for all possible target-masker location  
881 configurations, referred to as the spatial grid, for the example cell featured in A-C. Outlined spots  
882 indicate configurations shown in A-C, matched by the outline color. Performance is calculated using  
883 a template-matching approach based on differences in instantaneous firing rate and spike timing  
884 similarities between spike trains (see Methods, Neural discriminability using SPIKE-distance). The  
885 top grid shows discriminability for clean trials on top, while the bottom grid shows discriminability  
886 for masked trials. All blocks are color-coded according to the color axis shown to the right of the  
887 masked grid. Configurations with high performance ( $\geq 70\%$ ) and a large effect size ( $d \geq 1$ ), e.g., the  
888 configurations outlined in black and red, are referred to as hotspots. **E:** Effect sizes for each spatial  
889 grid configuration in **D**, with the same outlines corresponding to examples in A-C. Positive values  
890 represent an increase in performance relative to a null distribution where spike trains within each  
891 target are template-matched to each other, while negative values represent a decrease in  
892 performance relative to null. **F:** The performance of all 23 single units exhibiting at least one hotspot  
893 during control trials. The translucent yellow surface represents the upper envelope of best  
894 performance across all single units for each masked spatial configuration, while the translucent  
895 blue surface represents the performance threshold of 70% for hotspots. Solid gray markers  
896 represent masked configurations with performances above threshold, while unfilled gray markers  
897 represent data points with performances below threshold. Black markers represent the maximal  
898 performance used to represent the upper envelope.

899 **Figure 3. Effects of suppressing PV neurons on cortical discrimination. A:** Responses during  
900 clean stimulus trials originating at 45° from one example cell during control (**Ai**) and optogenetic  
901 (**Aii**) conditions. **Aiii:** Inset showing zoomed-in portion of the response between 0.1 and 0.4s after  
902 sound onset, as outlined in Ai and Aii. Responses during optogenetic trials show earlier onset and  
903 reduced spike timing consistency, compared to the control. **B:** Example spatial grids from the same  
904 single unit during control (**Bi**) and optogenetic (**Bii**) conditions, with the performances at Clean  
905 Target 45° outlined in black to correspond to responses shown in A. Performance is color-coded  
906 according to the axis shown to the right of the Laser grid. The reduction in spike timing  
907 reproducibility during optogenetic suppression (seen in Aiii) contributes to the decrease in  
908 performance (80%) compared to control trials at the same configuration (95%). Additionally,  
909 performance decreased during optogenetic suppression for the rest of the clean configurations,  
910 while performance at the masked control hotspots, outlined by dashed boxes in both Bi and Bii,  
911 decreased to below threshold: Target 45°, Masker 90° (75% to 55%); Target 45°, Masker -90° (79%  
912 to 64%); and Target 90°, Masker -90° (74% to 67%). **C:** Paired comparisons of SPIKE-distance-  
913 based performance from control and PV-suppressed trials at the same spatial grid location. Paired  
914 *t*-tests yielded a significant decrease in performance for both clean ( $n = 49$  configurations;  $p < 1e$ -  
915  $04$ ,  $d = 1.05$ ) and masked ( $n = 20$  configurations;  $p = 2e-04$ ,  $d = 1.03$ ) trials during optogenetic  
916 suppression, indicating that PV suppression significantly reduced discrimination performance.

917

918 **Figure 4. Effects of suppressing PV neurons on spike timing and rate-based coding**  
919 **measures. A:** Performance based on ISI-distance, which measures differences between trains in  
920 instantaneous firing rate only (see Methods, ISI-distance). Paired *t*-tests showed a significant  
921 decrease in performance for both clean ( $n = 49$  configurations;  $p < 1e-04$ ,  $d = 0.92$ ) and masked ( $n$   
922  $= 20$  configurations;  $p = 0.0034$ ,  $d = 0.75$ ) trials. **B:** Performance based on RI-SPIKE-distance,  
923 which measures differences between trains in spike timing only (see Methods, RI-SPIKE-distance).  
924 Paired *t*-tests showed a significant decrease in performance for both clean ( $p < 1e-04$ ,  $d = 0.95$ )  
925 and masked ( $p = 0.0011$ ,  $d = 0.86$ ) trials. **C:** Performance based on differences in total spike count  
926 between spike trains was near chance level, indicating that total spike count did not account for  
927 overall discrimination performance. Paired *t*-tests showed a significant decrease in performance  
928 for clean trials ( $p = 0.0590$ ,  $d = 0.28$ ) but not for masked trials ( $p = 0.020$ ,  $d = 0.56$ ). **D:** Summary  
929 figure showing contributions from spike distance measures presented in Figure 3C and 4A-C on  
930 the same scale and axis. Changes in spike timing and instantaneous firing rate-based measures  
931 (RI-SPIKE and ISI, respectively) provide relatively high discrimination performance and show a  
932 significant decrease upon optogenetic suppression of PV neurons.

933



934 **Figure 5. Effects of optogenetic suppression on spiking activity measures. A:** Changes in  
935 dissimilarity of target responses via rate-normalized RMS difference between target PSTHs during  
936 both conditions. Paired *t*-tests found significant decreases between conditions during both clean  
937 trials ( $n = 49$  configurations;  $p < 1e-04$ ,  $d = 0.93$ ) and masked trials ( $n = 20$  configurations;  $p =$   
938  $0.0031$ ,  $d = 0.76$ ). **B:** Changes in response reproducibility via trial similarity between responses to  
939 the same target during both conditions. Paired *t*-tests found a highly significant decrease between  
940 conditions during clean trials ( $n = 49$  configurations;  $p < 1e-04$ ,  $d = 0.85$ ) but not masked trials ( $n =$   
941  $20$  configurations;  $p = 0.7333$ ,  $d = 0.08$ ).

942 **Figure 6. Decoding time analysis. A:** Histogram of optimal  $\tau$  for hotspots across both conditions  
943 (control and laser) and stimulus types (clean and masked). Dashed line indicates median value of  
944 46.5ms, and shaded region represents the inter-quartile range (IQR) between 29ms and 79ms.  
945 Paired *t*-tests did not find a significant change in optimal  $\tau$  within hotspots between conditions  
946 during clean trials ( $n = 49$  configurations;  $p = 0.492$ ,  $d = -0.10$ ) but found a significant decrease  
947 during masked trials ( $n = 20$  configurations;  $p = 0.0098$ ,  $d = 0.64$ ). **B:** van Rossum-based  
948 performance with  $\tau$  set at 8ms. Performance was found to significantly decrease during both clean  
949 ( $p < 1e-04$ ,  $d = 0.74$ ) and masked ( $p = 0.0042$ ,  $d = 0.73$ ) trials. **C:** van Rossum-based performance  
950 with  $\tau$  set at 32ms. Performance was found to significantly decrease during both clean ( $p < 1e-04$ ,  
951  $d = 0.87$ ) and masked ( $p = 0.0098$ ,  $d = 0.76$ ) trials. **D:** van Rossum-based performance with  $\tau$  set  
952 at 256ms. Performance was found to significantly decrease during both clean ( $p < 1e-04$ ,  $d = 0.64$ )  
953 and masked ( $p < 1e-04$ ,  $d = 1.18$ ) trials.  
954

955 **Figure 7. Comparison of optimal  $\tau$  values and other time scales.** Semi-logarithmic plot showing  
956 various time-scales for spike timing in mouse ACx neurons compared to mouse vocalizations,  
957 human speech, and neural oscillations. Top: Time scales for human speech sounds, mouse  
958 vocalizations, and sniffing periods<sup>74</sup>. In the mouse time-scales, short and long USV bars represent  
959 the mean (black line)  $\pm$  2 SD. vocalization length. Within the plot, from left to right: the refractory  
960 period for single units (red dashed line); and the distribution of optimal  $\tau$  values from Figure 6 (solid  
961 black curve), with the dashed yellow line indicating the median value of 46.5ms and the shaded  
962 green region representing the IQR. The bottom axes show the time scale of optimal  $\tau$  values in ms  
963 and frequency in Hz, with the latter decreasing from left to right. Shaded bars represent frequency  
964 bands for neural oscillations.

965 **Figure 8. Cortical circuits for complex scene analysis.** Hypothesized conceptual model of  
966 cortical circuit underlying spatial grids. C and R cells represent excitatory units, I cells mediate  
967 within-channel inhibition, and X cells mediate cross-channel inhibition.

968

| $\tau$ (ms) | $d_{clean}$ | $p_{clean}$ | $d_{masked}$ | $p_{masked}$ |
|-------------|-------------|-------------|--------------|--------------|
| 1           | -0.02       | 0.9157      | 0.56         | 0.0226       |
| 2           | 0.11        | 0.4530      | 0.67         | 0.0074       |
| 4           | 0.35        | 0.0189      | 0.70         | 0.0055       |
| 8           | 0.74        | < 1e-04     | 0.73         | 0.0042       |
| 16          | 0.87        | < 1e-04     | 0.66         | 0.0079       |
| 32          | 0.87        | < 1e-04     | 0.64         | 0.0098       |
| 64          | 0.79        | < 1e-04     | 0.74         | 0.0035       |
| 128         | 0.72        | < 1e-04     | 1.03         | 2e-04        |
| 256         | 0.64        | < 1e-04     | 1.18         | < 1e-04      |

969  
970

**Table 1. Effect sizes and paired *t*-test results for all  $\tau$  values used in van Rossum distance-based performance calculations.**



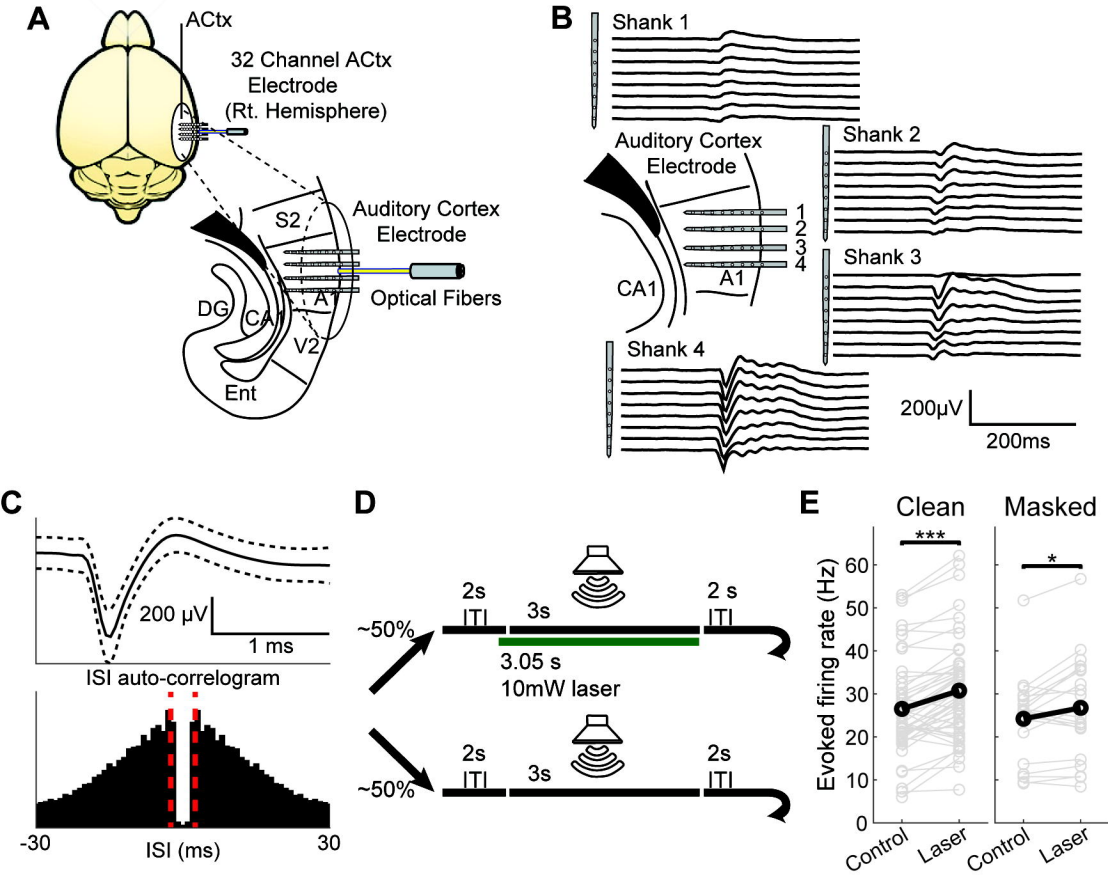

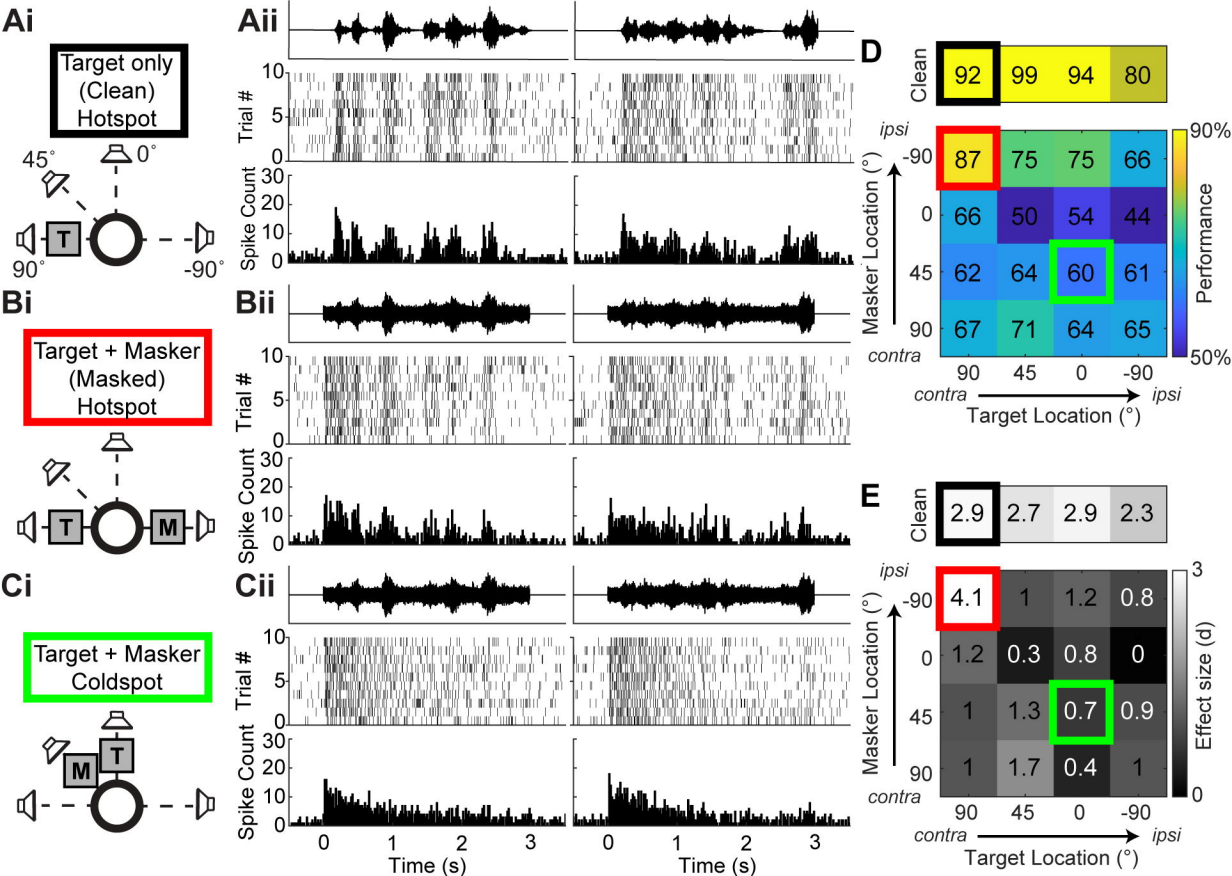

**F** Maximal performance across all single units

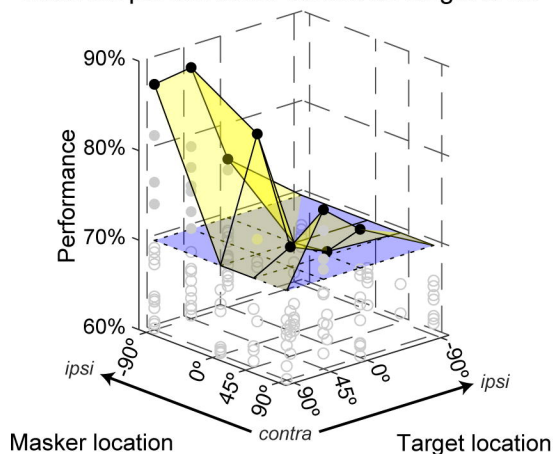

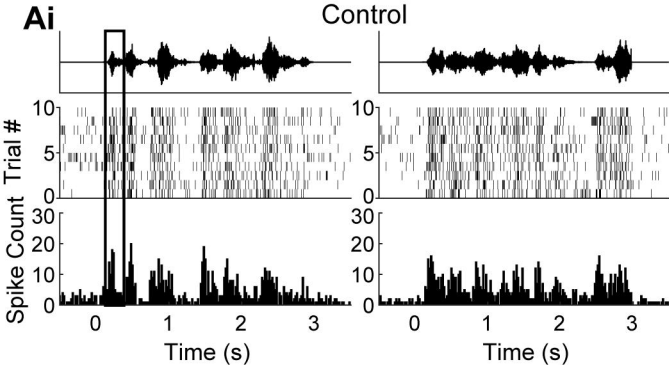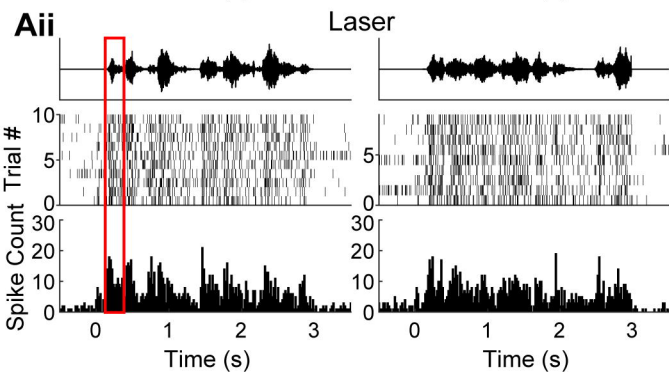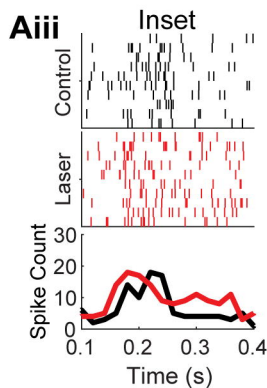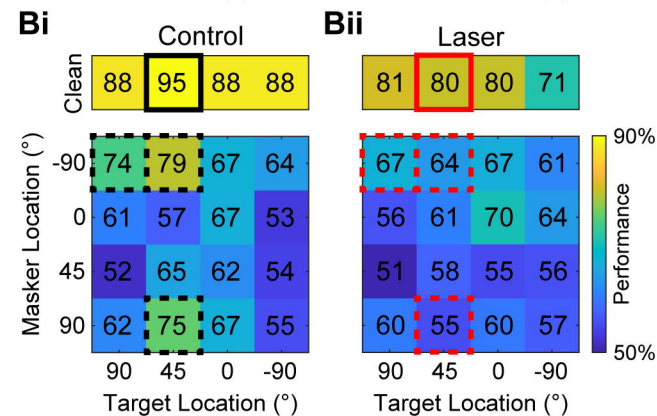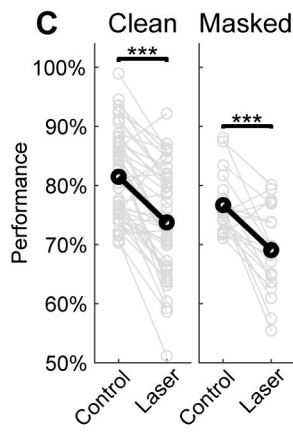

**A** Firing rate modulation  
-based performance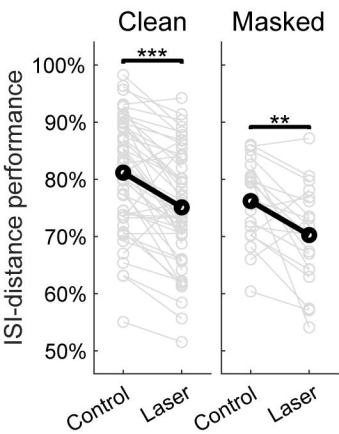**B** Spike timing-based  
performance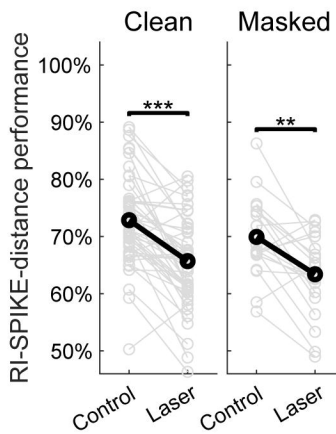**C** Mean firing rate-based  
performance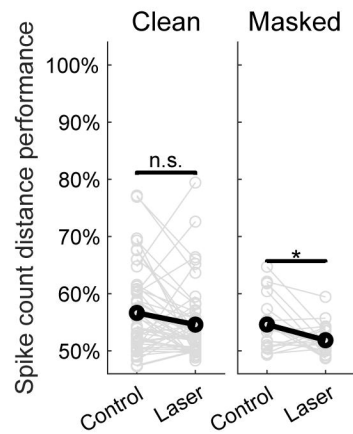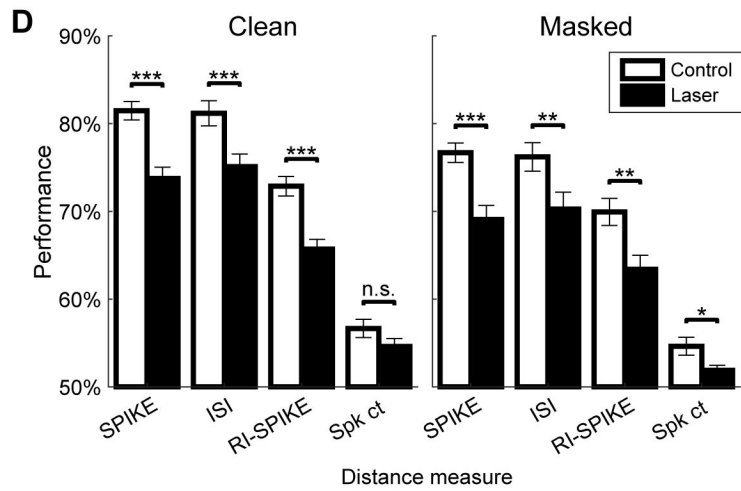

**A**

Dissimilarity of target responses

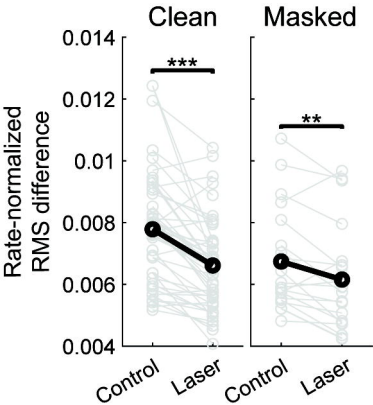**B**

Response reproducibility

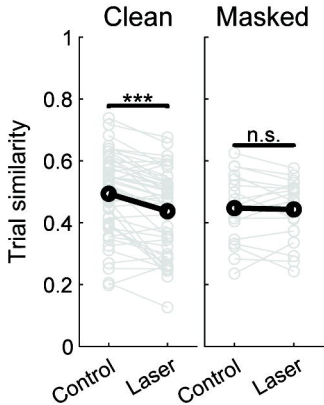



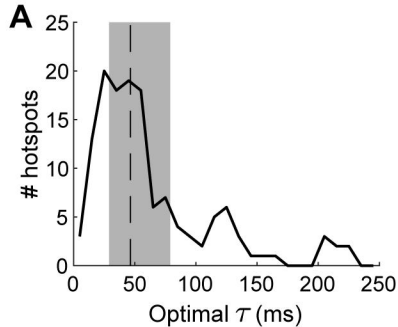

**B** Performance,  $\tau = 8$  ms

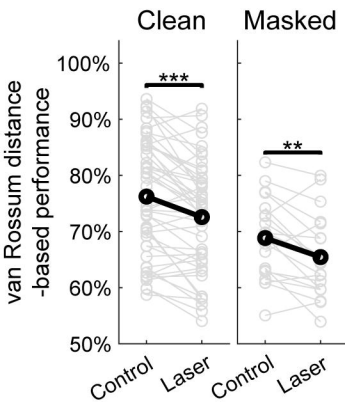

**C** Performance,  $\tau = 32$  ms

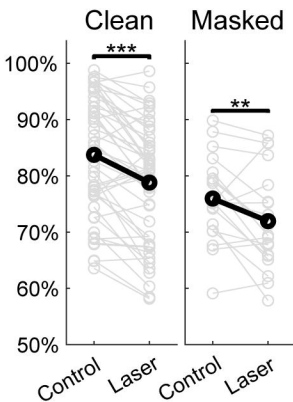

**D** Performance,  $\tau = 256$  ms

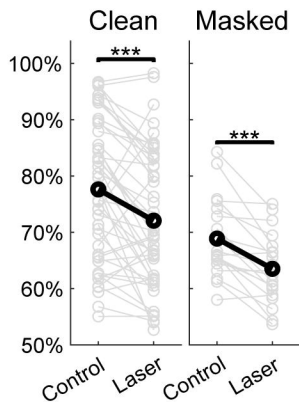

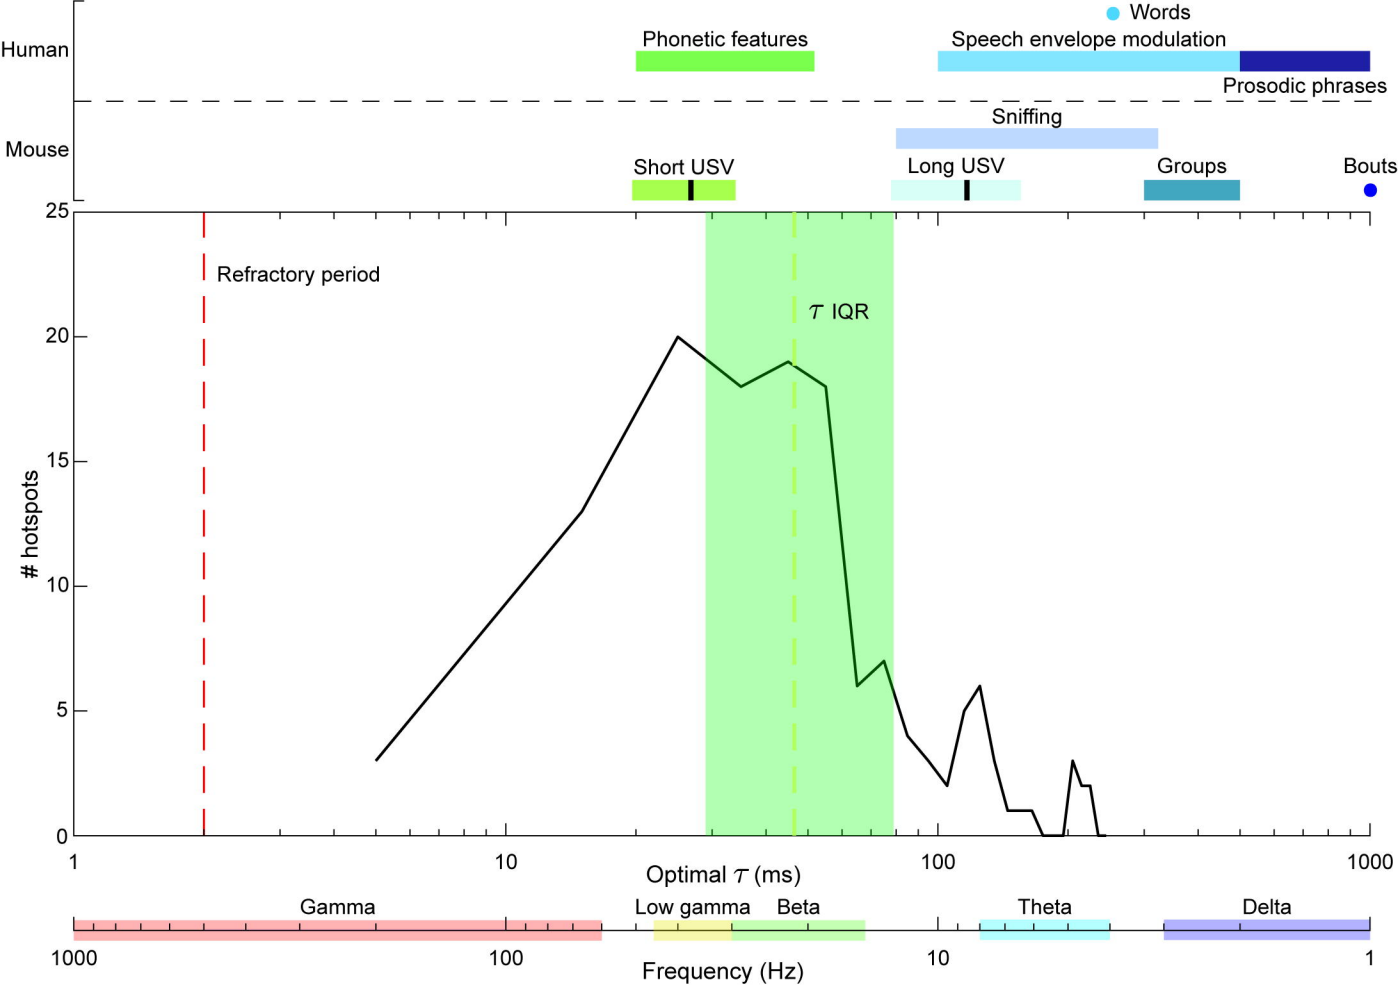

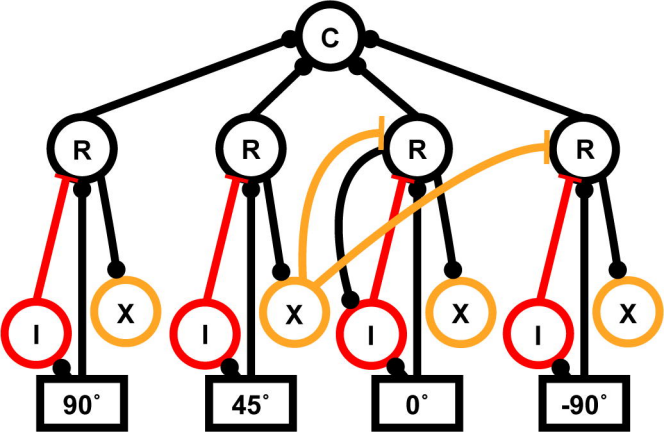

Source: https://www.biorxiv.org/content/10.1101/2021.09.11.459906.full.pdf
